# Supplementary material
Source: PubMed Central journal article supplement (PMC9117570)
Supplement: NIHMS1755793-supplement-tS1.pdf [file NIHMS1755793-supplement-tS1.pdf]

**Supplementary Table 1.** Untargeted mass spectrometry-based proteomics data was generated from trabecular bone from the femoral neck of two baboons, one 10 year-old and one 19 year-old. Extraction followed Jiang et al. (2007) with analysis of the initial bone fraction extracted with 1.2M HCl. We identified a total of 582 proteins, 463 proteins (with 2352 peptide spectral matches, PSMs) in the sample from the 10 year-old animal, and 384 proteins (with 2034 PSMs) in the sample from the 19 year-old animal. Peptides were identified by reference to the UniProt database. The complete list of identified proteins is below.

| Accession  | Description                                                                                  | Gene     |
|------------|----------------------------------------------------------------------------------------------|----------|
| A0A0A0MX79 | Uncharacterized protein OS=Papio anubis GN=A1BG PE=4 SV=1 - [A0A0A0MX79_PAPAN]               | A1BG     |
| A0A096MST3 | Uncharacterized protein OS=Papio anubis GN=A2M PE=4 SV=1 - [A0A096MST3_PAPAN]                | A2M      |
| A0A096NTE1 | Uncharacterized protein OS=Papio anubis GN=AATK PE=4 SV=1 - [A0A096NTE1_PAPAN]               | AATK     |
| A0A096MZB0 | Uncharacterized protein OS=Papio anubis GN=ACAT1 PE=3 SV=1 - [A0A096MZB0_PAPAN]              | ACAT1    |
| A0A096NKA9 | Aconitate hydratase, mitochondrial OS=Papio anubis GN=ACO2 PE=3 SV=1 - [A0A096NKA9_PAPAN]    | ACO2     |
| A0A096MPE7 | Uncharacterized protein OS=Papio anubis GN=ACP2 PE=4 SV=1 - [A0A096MPE7_PAPAN]               | ACP2     |
| A0A096NH80 | Uncharacterized protein OS=Papio anubis GN=ACSM5 PE=4 SV=1 - [A0A096NH80_PAPAN]              | ACSM5    |
| A0A096NZ53 | Uncharacterized protein OS=Papio anubis GN=ACTG2 PE=3 SV=1 - [A0A096NZ53_PAPAN]              | ACTG2    |
| A0A096NVR2 | Uncharacterized protein OS=Papio anubis GN=ACTN1 PE=4 SV=1 - [A0A096NVR2_PAPAN]              | ACTN1    |
| A0A096P4V6 | Uncharacterized protein OS=Papio anubis GN=ADAMTS14 PE=4 SV=1 - [A0A096P4V6_PAPAN]           | ADAMTS14 |
| A0A0A0MUG0 | Uncharacterized protein OS=Papio anubis GN=ADGRE5 PE=4 SV=1 - [A0A0A0MUG0_PAPAN]             | ADGRE5   |
| A0A096MTS5 | Uncharacterized protein OS=Papio anubis GN=AFAP1L1 PE=4 SV=1 - [A0A096MTS5_PAPAN]            | AFAP1L1  |
| A0A096NQL2 | Uncharacterized protein OS=Papio anubis GN=AGA PE=4 SV=1 - [A0A096NQL2_PAPAN]                | AGA      |
| A0A096NN36 | Uncharacterized protein OS=Papio anubis GN=AGBL1 PE=4 SV=1 - [A0A096NN36_PAPAN]              | AGBL1    |
| A0A096NPS0 | Uncharacterized protein OS=Papio anubis GN=AHSG PE=4 SV=1 - [A0A096NPS0_PAPAN]               | AHSG     |
| A0A096P1Z5 | Uncharacterized protein (Fragment) OS=Papio anubis GN=AK1 PE=3 SV=1 - [A0A096P1Z5_PAPAN]     | AK1      |
| A0A096N138 | Uncharacterized protein OS=Papio anubis GN=AKR1A1 PE=4 SV=1 - [A0A096N138_PAPAN]             | AKR1A1   |
| A0A096P0T7 | Delta-aminolevulinic acid dehydratase OS=Papio anubis GN=ALAD PE=3 SV=1 - [A0A096P0T7_PAPAN] | ALAD     |
| A0A096MVE5 | Uncharacterized protein OS=Papio anubis GN=ALB PE=4 SV=1 - [A0A096MVE5_PAPAN]                | ALB      |
| A0A0A0MU60 | Uncharacterized protein OS=Papio anubis GN=ALDH16A1 PE=4 SV=1 - [A0A0A0MU60_PAPAN]           | ALDH16A1 |
| A0A096NWR4 | Uncharacterized protein OS=Papio anubis GN=ALDH9A1 PE=3 SV=1 - [A0A096NWR4_PAPAN]            | ALDH9A1  |
| A0A096MLT2 | Fructose-bisphosphate aldolase OS=Papio anubis GN=ALDOA PE=3 SV=1 - [A0A096MLT2_PAPAN]       | ALDOA    |
| A0A096P2G1 | Uncharacterized protein OS=Papio anubis GN=ALOX15 PE=3 SV=1 - [A0A096P2G1_PAPAN]             | ALOX15   |
| A0A096P488 | Uncharacterized protein OS=Papio anubis GN=ALOX5 PE=3 SV=1 - [A0A096P488_PAPAN]              | ALOX5    |
| A0A096N206 | Alkaline phosphatase OS=Papio anubis GN=ALPL PE=3 SV=1 - [A0A096N206_PAPAN]                  | ALPL     |
| A0A096P0T2 | Uncharacterized protein OS=Papio anubis GN=AMBP PE=4 SV=1 - [A0A096P0T2_PAPAN]               | AMBP     |
| A0A096N625 | Anoctamin OS=Papio anubis GN=ANO10 PE=3 SV=1 - [A0A096N625_PAPAN]                            | ANO10    |
| A0A096P1S5 | Annexin OS=Papio anubis GN=ANXA1 PE=3 SV=1 - [A0A096P1S5_PAPAN]                              | ANXA1    |
| A0A096P4G1 | Annexin OS=Papio anubis GN=ANXA11 PE=3 SV=1 - [A0A096P4G1_PAPAN]                             | ANXA11   |
| A0A096NM87 | Annexin OS=Papio anubis GN=ANXA2 PE=3 SV=1 - [A0A096NM87_PAPAN]                              | ANXA2    |
| A0A096N9E8 | Annexin (Fragment) OS=Papio anubis GN=ANXA3 PE=3 SV=1 - [A0A096N9E8_PAPAN]                   | ANXA3    |
| A0A096NA81 | Annexin OS=Papio anubis GN=ANXA5 PE=3 SV=1 - [A0A096NA81_PAPAN]                              | ANXA5    |
| A0A096MXR1 | Annexin OS=Papio anubis GN=ANXA6 PE=3 SV=1 - [A0A096MXR1_PAPAN]                              | ANXA6    |
| A0A0A0MUL4 | Uncharacterized protein OS=Papio anubis GN=AP2A1 PE=4 SV=1 - [A0A0A0MUL4_PAPAN]              | AP2A1    |
| A0A096P3X4 | Uncharacterized protein OS=Papio anubis GN=AP2B1 PE=4 SV=1 - [A0A096P3X4_PAPAN]              | AP2B1    |
| A0A096NQN2 | Pentaxin OS=Papio anubis GN=APCS PE=3 SV=1 - [A0A096NQN2_PAPAN]                              | APCS     |
| A0A096NTJ4 | Uncharacterized protein OS=Papio anubis GN=ARHGDI A PE=4 SV=1 - [A0A096NTJ4_PAPAN]           | ARHGDI A |
| A0A096NPQ4 | Uncharacterized protein OS=Papio anubis GN=ARHGDI B PE=4 SV=1 - [A0A096NPQ4_PAPAN]           | ARHGDI B |
| A0A096MQV9 | Uncharacterized protein OS=Papio anubis GN=ARNT PE=4 SV=1 - [A0A096MQV9_PAPAN]               | ARNT     |

|            |                                                                                   |         |
|------------|-----------------------------------------------------------------------------------|---------|
| A0A096NQ28 | Uncharacterized protein OS=Papio anubis GN=ARPC1B PE=4 SV=1 - [A0A096NQ28_PAPAN]  | ARPC1B  |
| A0A096MR34 | Uncharacterized protein OS=Papio anubis GN=ARSI PE=4 SV=1 - [A0A096MR34_PAPAN]    | ARSI    |
| A0A096NGC1 | Uncharacterized protein OS=Papio anubis GN=ASAH1 PE=4 SV=1 - [A0A096NGC1_PAPAN]   | ASAH1   |
| A0A096MYH7 | ATP synthase subunit beta OS=Papio anubis GN=ATP5B PE=3 SV=1 - [A0A096MYH7_PAPAN] | ATP5B   |
| A0A096NVA4 | Uncharacterized protein OS=Papio anubis GN=ATRN PE=4 SV=1 - [A0A096NVA4_PAPAN]    | ATRN    |
| A0A0A0MV34 | Uncharacterized protein OS=Papio anubis GN=AZU1 PE=3 SV=1 - [A0A0A0MV34_PAPAN]    | AZU1    |
| A0A096MP64 | Uncharacterized protein OS=Papio anubis GN=B3GAT2 PE=4 SV=1 - [A0A096MP64_PAPAN]  | B3GAT2  |
| A0A096MLS4 | Uncharacterized protein OS=Papio anubis GN=BANF1 PE=4 SV=1 - [A0A096MLS4_PAPAN]   | BANF1   |
| A0A096MWH2 | Uncharacterized protein OS=Papio anubis GN=BDH1 PE=3 SV=1 - [A0A096MWH2_PAPAN]    | BDH1    |
| A0A096NEE7 | Uncharacterized protein OS=Papio anubis GN=BGN PE=4 SV=1 - [A0A096NEE7_PAPAN]     | BGN     |
| A0A096NXG0 | Uncharacterized protein OS=Papio anubis GN=BPI PE=4 SV=1 - [A0A096NXG0_PAPAN]     | BPI     |
| A0A096NZG7 | Uncharacterized protein OS=Papio anubis GN=BST1 PE=4 SV=1 - [A0A096NZG7_PAPAN]    | BST1    |
| B6ULW6     | Theta defensin subunit C OS=Papio anubis GN=BTDC PE=1 SV=1 - [BTDC_PAPAN]         | BTDC    |
| A0A0A0MUD9 | Uncharacterized protein OS=Papio anubis GN=C3 PE=4 SV=1 - [A0A0A0MUD9_PAPAN]      | C3      |
| A0A096N7V3 | Uncharacterized protein OS=Papio anubis GN=C4BPA PE=4 SV=1 - [A0A096N7V3_PAPAN]   | C4BPA   |
| A0A096N4A4 | Uncharacterized protein OS=Papio anubis GN=C9 PE=4 SV=1 - [A0A096N4A4_PAPAN]      | C9      |
| A0A096MZB4 | Uncharacterized protein OS=Papio anubis GN=CA1 PE=4 SV=1 - [A0A096MZB4_PAPAN]     | CA1     |
| A0A096NDF1 | Uncharacterized protein OS=Papio anubis GN=CA2 PE=4 SV=1 - [A0A096NDF1_PAPAN]     | CA2     |
| A0A096NBY7 | Uncharacterized protein OS=Papio anubis GN=CA3 PE=4 SV=1 - [A0A096NBY7_PAPAN]     | CA3     |
| A0A096NG29 | Uncharacterized protein OS=Papio anubis GN=CALM3 PE=4 SV=1 - [A0A096NG29_PAPAN]   | CALM3   |
| A0A0A0MUC4 | Uncharacterized protein OS=Papio anubis GN=CALR PE=3 SV=1 - [A0A0A0MUC4_PAPAN]    | CALR    |
| A0A096N1K2 | Uncharacterized protein OS=Papio anubis GN=CAP1 PE=4 SV=1 - [A0A096N1K2_PAPAN]    | CAP1    |
| A0A096N2T5 | Uncharacterized protein OS=Papio anubis GN=CAPG PE=4 SV=1 - [A0A096N2T5_PAPAN]    | CAPG    |
| A0A096NE85 | Uncharacterized protein OS=Papio anubis GN=CAPZA1 PE=4 SV=1 - [A0A096NE85_PAPAN]  | CAPZA1  |
| A0A096MVM8 | Uncharacterized protein OS=Papio anubis GN=CAPZB PE=4 SV=1 - [A0A096MVM8_PAPAN]   | CAPZB   |
| A0A096NTH1 | Uncharacterized protein OS=Papio anubis GN=CASC5 PE=4 SV=1 - [A0A096NTH1_PAPAN]   | CASC5   |
| A0A096MZW9 | Uncharacterized protein OS=Papio anubis GN=CASP3 PE=3 SV=1 - [A0A096MZW9_PAPAN]   | CASP3   |
| A0A096N5I3 | Uncharacterized protein OS=Papio anubis GN=CASP7 PE=3 SV=1 - [A0A096N5I3_PAPAN]   | CASP7   |
| A0A096MPH5 | Catalase OS=Papio anubis GN=CAT PE=3 SV=1 - [A0A096MPH5_PAPAN]                    | CAT     |
| A0A096NJ73 | Uncharacterized protein OS=Papio anubis GN=CBR1 PE=3 SV=1 - [A0A096NJ73_PAPAN]    | CBR1    |
| A0A096N9W3 | Uncharacterized protein OS=Papio anubis GN=CCDC22 PE=4 SV=1 - [A0A096N9W3_PAPAN]  | CCDC22  |
| A0A096P3Y7 | C-C motif chemokine OS=Papio anubis GN=CCL16 PE=3 SV=1 - [A0A096P3Y7_PAPAN]       | CCL16   |
| A0A096NER7 | Uncharacterized protein OS=Papio anubis GN=CD36 PE=4 SV=1 - [A0A096NER7_PAPAN]    | CD36    |
| A0A096NAI8 | Uncharacterized protein OS=Papio anubis GN=CD44 PE=4 SV=1 - [A0A096NAI8_PAPAN]    | CD44    |
| A0A096NRJ1 | Uncharacterized protein OS=Papio anubis GN=CD59 PE=4 SV=1 - [A0A096NRJ1_PAPAN]    | CD59    |
| A0A096N207 | Uncharacterized protein OS=Papio anubis GN=CDA PE=4 SV=1 - [A0A096N207_PAPAN]     | CDA     |
| A0A096P561 | Uncharacterized protein OS=Papio anubis GN=CDK1 PE=4 SV=1 - [A0A096P561_PAPAN]    | CDK1    |
| A0A096P1Z7 | Uncharacterized protein OS=Papio anubis GN=CDK9 PE=4 SV=1 - [A0A096P1Z7_PAPAN]    | CDK9    |
| A0A0A0MXE8 | Uncharacterized protein OS=Papio anubis GN=CEACAM6 PE=4 SV=1 - [A0A0A0MXE8_PAPAN] | CEACAM6 |
| A0A096NVX5 | Uncharacterized protein OS=Papio anubis GN=CECR5 PE=4 SV=1 - [A0A096NVX5_PAPAN]   | CECR5   |
| A0A096NG55 | Kinesin-like protein OS=Papio anubis GN=CENPE PE=3 SV=1 - [A0A096NG55_PAPAN]      | CENPE   |
| A0A096NIZ5 | Uncharacterized protein OS=Papio anubis GN=CENPQ PE=4 SV=1 - [A0A096NIZ5_PAPAN]   | CENPQ   |
| A0A096MY75 | Uncharacterized protein OS=Papio anubis GN=CEP135 PE=4 SV=1 - [A0A096MY75_PAPAN]  | CEP135  |
| A0A096N3P8 | Uncharacterized protein OS=Papio anubis GN=CFH PE=4 SV=1 - [A0A096N3P8_PAPAN]     | CFH     |
| A0A096P4I7 | Uncharacterized protein OS=Papio anubis GN=CHAD PE=4 SV=1 - [A0A096P4I7_PAPAN]    | CHAD    |
| A0A096NEP2 | Uncharacterized protein OS=Papio anubis GN=CHIT1 PE=3 SV=1 - [A0A096NEP2_PAPAN]   | CHIT1   |
| A0A0A0MVC7 | Uncharacterized protein OS=Papio anubis GN=CKM PE=3 SV=1 - [A0A0A0MVC7_PAPAN]     | CKM     |
| A0A0A0MWW6 | Uncharacterized protein OS=Papio anubis GN=CLEC11A PE=4 SV=1 - [A0A0A0MWW6_PAPAN] | CLEC11A |

|            |                                                                                                                                                  |         |
|------------|--------------------------------------------------------------------------------------------------------------------------------------------------|---------|
| A0A096NPW2 | Uncharacterized protein OS=Papio anubis GN=CLEC3B PE=4 SV=1 - [A0A096NPW2_PAPAN]                                                                 | CLEC3B  |
| A0A096N1Y1 | Clusterin OS=Papio anubis GN=CLU PE=3 SV=1 - [A0A096N1Y1_PAPAN]                                                                                  | CLU     |
| A0A096N137 | Uncharacterized protein OS=Papio anubis GN=CNDP2 PE=4 SV=1 - [A0A096N137_PAPAN]                                                                  | CNDP2   |
| A0A096N5F8 | Uncharacterized protein OS=Papio anubis GN=CNKSR3 PE=4 SV=1 - [A0A096N5F8_PAPAN]                                                                 | CNKSR3  |
| A0A096NJ39 | Uncharacterized protein OS=Papio anubis GN=CNOT1 PE=4 SV=1 - [A0A096NJ39_PAPAN]                                                                  | CNOT1   |
| A0A096P5R1 | 2',3'-cyclic-nucleotide 3'-phosphodiesterase OS=Papio anubis GN=CNP PE=3 SV=1 - [A0A096P5R1_PAPAN]                                               | CNP     |
| A0A096NHF5 | Uncharacterized protein OS=Papio anubis GN=COL11A2 PE=4 SV=1 - [A0A096NHF5_PAPAN]                                                                | COL11A2 |
| A0A096NAB2 | Uncharacterized protein OS=Papio anubis GN=COL12A1 PE=4 SV=1 - [A0A096NAB2_PAPAN]                                                                | COL12A1 |
| A0A096P4E5 | Uncharacterized protein OS=Papio anubis GN=COL1A1 PE=4 SV=1 - [A0A096P4E5_PAPAN]                                                                 | COL1A1  |
| A0A096NVZ9 | Uncharacterized protein OS=Papio anubis GN=COL1A2 PE=4 SV=1 - [A0A096NVZ9_PAPAN]                                                                 | COL1A2  |
| A0A096MN49 | Uncharacterized protein OS=Papio anubis GN=COL2A1 PE=4 SV=1 - [A0A096MN49_PAPAN]                                                                 | COL2A1  |
| A0A096MN15 | Uncharacterized protein OS=Papio anubis GN=COL4A2 PE=4 SV=1 - [A0A096MN15_PAPAN]                                                                 | COL4A2  |
| A0A096MVP2 | Uncharacterized protein OS=Papio anubis GN=COL5A2 PE=4 SV=1 - [A0A096MVP2_PAPAN]                                                                 | COL5A2  |
| A0A096MTH6 | Uncharacterized protein OS=Papio anubis GN=COL6A3 PE=4 SV=1 - [A0A096MTH6_PAPAN]                                                                 | COL6A3  |
| A0A096NA42 | Uncharacterized protein OS=Papio anubis GN=COL6A5 PE=4 SV=1 - [A0A096NA42_PAPAN]                                                                 | COL6A5  |
| A0A096N9M9 | Uncharacterized protein OS=Papio anubis GN=COL6A6 PE=4 SV=1 - [A0A096N9M9_PAPAN]                                                                 | COL6A6  |
| A0A096NRK5 | Uncharacterized protein OS=Papio anubis GN=COL7A1 PE=4 SV=1 - [A0A096NRK5_PAPAN]                                                                 | COL7A1  |
| A0A096NHR2 | Coronin OS=Papio anubis GN=CORO1A PE=3 SV=1 - [A0A096NHR2_PAPAN]                                                                                 | CORO1A  |
| A0A096NGI2 | Uncharacterized protein OS=Papio anubis GN=COTL1 PE=4 SV=1 - [A0A096NGI2_PAPAN]                                                                  | COTL1   |
| A0A096N1V5 | Uncharacterized protein OS=Papio anubis GN=COX4I1 PE=4 SV=1 - [A0A096N1V5_PAPAN]                                                                 | COX4I1  |
| A0A096NQN8 | Uncharacterized protein OS=Papio anubis GN=CP PE=4 SV=1 - [A0A096NQN8_PAPAN]                                                                     | CP      |
| A0A096NEM8 | Uncharacterized protein OS=Papio anubis GN=CPM PE=4 SV=1 - [A0A096NEM8_PAPAN]                                                                    | CPM     |
| A0A096MYJ5 | Uncharacterized protein OS=Papio anubis GN=CPNE3 PE=4 SV=1 - [A0A096MYJ5_PAPAN]                                                                  | CPNE3   |
| A0A096MZS4 | Uncharacterized protein OS=Papio anubis GN=CREG1 PE=4 SV=1 - [A0A096MZS4_PAPAN]                                                                  | CREG1   |
| A0A096NJ02 | Uncharacterized protein OS=Papio anubis GN=CRISP3 PE=4 SV=1 - [A0A096NJ02_PAPAN]                                                                 | CRISP3  |
| A0A096NNA7 | Uncharacterized protein OS=Papio anubis GN=CRTC3 PE=4 SV=1 - [A0A096NNA7_PAPAN]                                                                  | CRTC3   |
| A0A096MR79 | Uncharacterized protein OS=Papio anubis GN=CRYBA2 PE=4 SV=1 - [A0A096MR79_PAPAN]                                                                 | CRYBA2  |
| A0A096NH04 | Citrate synthase (Fragment) OS=Papio anubis GN=CS PE=3 SV=1 - [A0A096NH04_PAPAN]                                                                 | CS      |
| A0A096N711 | Uncharacterized protein OS=Papio anubis GN=CTBS PE=3 SV=1 - [A0A096N711_PAPAN]                                                                   | CTBS    |
| A0A096NCJ9 | Uncharacterized protein OS=Papio anubis GN=CTHRC1 PE=4 SV=1 - [A0A096NCJ9_PAPAN]                                                                 | CTHRC1  |
| A0A096N4F2 | Uncharacterized protein OS=Papio anubis GN=CTSC PE=3 SV=1 - [A0A096N4F2_PAPAN]                                                                   | CTSC    |
| A0A096NXD2 | Uncharacterized protein OS=Papio anubis GN=CTSG PE=3 SV=1 - [A0A096NXD2_PAPAN]                                                                   | CTSG    |
| A0A096N574 | Uncharacterized protein OS=Papio anubis GN=CUL1 PE=3 SV=1 - [A0A096N574_PAPAN]                                                                   | CUL1    |
| A0A096NI95 | Uncharacterized protein OS=Papio anubis GN=CUL7 PE=3 SV=1 - [A0A096NI95_PAPAN]                                                                   | CUL7    |
| A0A096NHI8 | Uncharacterized protein OS=Papio anubis GN=CUTA PE=4 SV=1 - [A0A096NHI8_PAPAN]                                                                   | CUTA    |
| A0A096MRV2 | Uncharacterized protein OS=Papio anubis GN=CYBB PE=4 SV=1 - [A0A096MRV2_PAPAN]                                                                   | CYBB    |
| G4XXN9     | Cytochrome c OS=Papio anubis GN=CYCS PE=3 SV=1 - [G4XXN9_PAPAN]                                                                                  | CYCS    |
| A0A096NGA4 | Uncharacterized protein OS=Papio anubis GN=DCN PE=4 SV=1 - [A0A096NGA4_PAPAN]                                                                    | DCN     |
| A0A096MLK1 | Uncharacterized protein OS=Papio anubis GN=DDB1 PE=4 SV=1 - [A0A096MLK1_PAPAN]                                                                   | DDB1    |
| A0A096NAV0 | Dolichyl-diphosphooligosaccharide--protein glycosyltransferase 48 kDa subunit (Fragment) OS=Papio anubis GN=DDOST PE=3 SV=1 - [A0A096NAV0_PAPAN] | DDOST   |
| A0A096NQF3 | Uncharacterized protein OS=Papio anubis GN=DDX60 PE=4 SV=1 - [A0A096NQF3_PAPAN]                                                                  | DDX60   |
| BOCM49     | Desmin (Predicted) OS=Papio anubis GN=DES PE=3 SV=1 - [BOCM49_PAPAN]                                                                             | DES     |
| A0A096MMC1 | Diacylglycerol kinase OS=Papio anubis GN=DGKZ PE=3 SV=1 - [A0A096MMC1_PAPAN]                                                                     | DGKZ    |
| A0A096NZJ8 | Uncharacterized protein OS=Papio anubis GN=DHX15 PE=4 SV=1 - [A0A096NZJ8_PAPAN]                                                                  | DHX15   |
| A0A096NF79 | Dihydrolipoyl dehydrogenase OS=Papio anubis GN=DLD PE=4 SV=1 - [A0A096NF79_PAPAN]                                                                | DLD     |
| A0A096MVN8 | Uncharacterized protein OS=Papio anubis GN=DTX3L PE=4 SV=1 - [A0A096MVN8_PAPAN]                                                                  | DTX3L   |
| A0A096NLZ0 | Uncharacterized protein OS=Papio anubis GN=DUOX2 PE=4 SV=1 - [A0A096NLZ0_PAPAN]                                                                  | DUOX2   |

|            |                                                                                                         |         |
|------------|---------------------------------------------------------------------------------------------------------|---------|
| A0A0A0MV30 | Uncharacterized protein OS=Papio anubis GN=DUS3L PE=4 SV=1 - [A0A0A0MV30_PAPAN]                         | DUS3L   |
| A0A096NBU2 | Uncharacterized protein OS=Papio anubis GN=EDC4 PE=4 SV=1 - [A0A096NBU2_PAPAN]                          | EDC4    |
| A9X189     | Elongation factor 1-alpha OS=Papio anubis GN=EEF1A1 PE=3 SV=1 - [A9X189_PAPAN]                          | EEF1A1  |
| A0A096NN64 | Elongation factor 1-alpha OS=Papio anubis GN=EEF1A2 PE=3 SV=1 - [A0A096NN64_PAPAN]                      | EEF1A2  |
| A0A096NWT2 | Uncharacterized protein OS=Papio anubis GN=EEF1D PE=4 SV=1 - [A0A096NWT2_PAPAN]                         | EEF1D   |
| A0A0A0MUJ5 | Uncharacterized protein OS=Papio anubis GN=EEF2 PE=4 SV=1 - [A0A0A0MUJ5_PAPAN]                          | EEF2    |
| A0A096NHB9 | Uncharacterized protein OS=Papio anubis GN=EEF2K PE=4 SV=1 - [A0A096NHB9_PAPAN]                         | EEF2K   |
| C9EI30     | Elastase 2 OS=Papio anubis GN=ELANE PE=2 SV=1 - [C9EI30_PAPAN]                                          | ELANE   |
| A0A096P2I8 | Uncharacterized protein OS=Papio anubis GN=ENO3 PE=3 SV=1 - [A0A096P2I8_PAPAN]                          | ENO3    |
| A0A096MYL7 | Uncharacterized protein OS=Papio anubis GN=EP400 PE=4 SV=1 - [A0A096MYL7_PAPAN]                         | EP400   |
| A0A096NQX5 | Uncharacterized protein OS=Papio anubis GN=EPDR1 PE=4 SV=1 - [A0A096NQX5_PAPAN]                         | EPDR1   |
| A0A096P4S9 | Uncharacterized protein OS=Papio anubis GN=EPX PE=4 SV=1 - [A0A096P4S9_PAPAN]                           | EPX     |
| A0A0A0MWL3 | Uncharacterized protein OS=Papio anubis GN=ETFB PE=4 SV=1 - [A0A0A0MWL3_PAPAN]                          | ETFB    |
| A0A096NYN0 | Uncharacterized protein OS=Papio anubis GN=EVX1 PE=4 SV=1 - [A0A096NYN0_PAPAN]                          | EVX1    |
| A0A096N4Z1 | Uncharacterized protein OS=Papio anubis GN=F2 PE=3 SV=1 - [A0A096N4Z1_PAPAN]                            | F2      |
| A0A096NEF0 | Uncharacterized protein OS=Papio anubis GN=F9 PE=3 SV=1 - [A0A096NEF0_PAPAN]                            | F9      |
| A0A096MNV7 | Uncharacterized protein OS=Papio anubis GN=FABP4 PE=3 SV=1 - [A0A096MNV7_PAPAN]                         | FABP4   |
| A0A096NMX8 | Uncharacterized protein OS=Papio anubis GN=FAH PE=4 SV=1 - [A0A096NMX8_PAPAN]                           | FAH     |
| A0A096NBZ2 | Uncharacterized protein OS=Papio anubis GN=FAM126B PE=4 SV=1 - [A0A096NBZ2_PAPAN]                       | FAM126B |
| A0A096NG80 | Uncharacterized protein OS=Papio anubis GN=FAM208A PE=4 SV=1 - [A0A096NG80_PAPAN]                       | FAM208A |
| A0A096NM08 | Uncharacterized protein OS=Papio anubis GN=FBN1 PE=4 SV=1 - [A0A096NM08_PAPAN]                          | FBN1    |
| A0A096NXX6 | Fibrinogen alpha chain OS=Papio anubis GN=FGA PE=4 SV=1 - [A0A096NXX6_PAPAN]                            | FGA     |
| A0A096N6F9 | Fibrinogen beta chain OS=Papio anubis GN=FGB PE=4 SV=1 - [A0A096N6F9_PAPAN]                             | FGB     |
| A0A096MVI8 | Uncharacterized protein OS=Papio anubis GN=FGFR3 PE=4 SV=1 - [A0A096MVI8_PAPAN]                         | FGFR3   |
| A0A096NZ34 | Uncharacterized protein OS=Papio anubis GN=FGG PE=4 SV=1 - [A0A096NZ34_PAPAN]                           | FGG     |
| A0A096MZL6 | Uncharacterized protein OS=Papio anubis GN=FGL2 PE=4 SV=1 - [A0A096MZL6_PAPAN]                          | FGL2    |
| A0A096MTC7 | Uncharacterized protein OS=Papio anubis GN=FKBP7 PE=4 SV=1 - [A0A096MTC7_PAPAN]                         | FKBP7   |
| A9CB59     | Filamin A, alpha (Predicted) OS=Papio anubis GN=FLNA PE=4 SV=1 - [A9CB59_PAPAN]                         | FLNA    |
| A0A096P662 | Uncharacterized protein OS=Papio anubis GN=FMNL1 PE=4 SV=1 - [A0A096P662_PAPAN]                         | FMNL1   |
| A0A096NCS4 | Uncharacterized protein OS=Papio anubis GN=FN1 PE=4 SV=1 - [A0A096NCS4_PAPAN]                           | FN1     |
| A0A096N3C9 | Uncharacterized protein OS=Papio anubis GN=FRRS1 PE=4 SV=1 - [A0A096N3C9_PAPAN]                         | FRRS1   |
| A0A0A0MU30 | Ferritin OS=Papio anubis GN=FTL PE=3 SV=1 - [A0A0A0MU30_PAPAN]                                          | FTL     |
| A0A096N7X4 | Uncharacterized protein OS=Papio anubis GN=FUBP1 PE=4 SV=1 - [A0A096N7X4_PAPAN]                         | FUBP1   |
| A0A0A0MUE6 | Uncharacterized protein OS=Papio anubis GN=FUZ PE=4 SV=1 - [A0A0A0MUE6_PAPAN]                           | FUZ     |
| A0A096P631 | Uncharacterized protein (Fragment) OS=Papio anubis GN=FZD2 PE=4 SV=1 - [A0A096P631_PAPAN]               | FZD2    |
| A0A096NEJ6 | Uncharacterized protein OS=Papio anubis GN=GAB2 PE=4 SV=1 - [A0A096NEJ6_PAPAN]                          | GAB2    |
| A0A096NWZ8 | Uncharacterized protein OS=Papio anubis GN=GALNS PE=4 SV=1 - [A0A096NWZ8_PAPAN]                         | GALNS   |
| A0A096MPA8 | Uncharacterized protein OS=Papio anubis GN=GANAB PE=3 SV=1 - [A0A096MPA8_PAPAN]                         | GANAB   |
| Q6Y5H1     | Glyceraldehyde-3-phosphate dehydrogenase (Fragment) OS=Papio anubis GN=GAPDH PE=2 SV=1 - [Q6Y5H1_PAPAN] | GAPDH   |
| A0A0A0MVQ6 | Uncharacterized protein OS=Papio anubis GN=GATAD2A PE=4 SV=1 - [A0A0A0MVQ6_PAPAN]                       | GATAD2A |
| A0A096NLZ6 | Uncharacterized protein OS=Papio anubis GN=GATM PE=4 SV=1 - [A0A096NLZ6_PAPAN]                          | GATM    |
| A0A096MVE4 | Uncharacterized protein OS=Papio anubis GN=GC PE=4 SV=1 - [A0A096MVE4_PAPAN]                            | GC      |
| A0A096NCD4 | Uncharacterized protein OS=Papio anubis GN=GCC2 PE=4 SV=1 - [A0A096NCD4_PAPAN]                          | GCC2    |
| A0A096P3C0 | Uncharacterized protein OS=Papio anubis GN=GDI2 PE=4 SV=1 - [A0A096P3C0_PAPAN]                          | GDI2    |
| A0A096NTS0 | Uncharacterized protein OS=Papio anubis GN=GGT5 PE=4 SV=1 - [A0A096NTS0_PAPAN]                          | GGT5    |
| A0A096P5S3 | Uncharacterized protein (Fragment) OS=Papio anubis GN=GHDC PE=4 SV=1 - [A0A096P5S3_PAPAN]               | GHDC    |
| A0A096N411 | Uncharacterized protein OS=Papio anubis GN=GLMP PE=4 SV=1 - [A0A096N411_PAPAN]                          | GLMP    |

|            |                                                                                             |           |
|------------|---------------------------------------------------------------------------------------------|-----------|
| AOA096NHX0 | Lactoylglutathione lyase OS=Papio anubis GN=GLO1 PE=3 SV=1 - [AOA096NHX0_PAPAN]             | GLO1      |
| AOA096N4P5 | Uncharacterized protein OS=Papio anubis GN=GLRX PE=4 SV=1 - [AOA096N4P5_PAPAN]              | GLRX      |
| AOA096MSJ9 | Uncharacterized protein OS=Papio anubis GN=GM2A PE=4 SV=1 - [AOA096MSJ9_PAPAN]              | GM2A      |
| AOA096MWX7 | N-acetylglucosamine-6-sulfatase OS=Papio anubis GN=GNS PE=3 SV=1 - [AOA096MWX7_PAPAN]       | GNS       |
| AOA096P648 | Aspartate aminotransferase OS=Papio anubis GN=GOT1 PE=3 SV=1 - [AOA096P648_PAPAN]           | GOT1      |
| AOA096NVM9 | Uncharacterized protein OS=Papio anubis GN=GPHN PE=4 SV=1 - [AOA096NVM9_PAPAN]              | GPHN      |
| AOA0A0MUJ3 | Glucose-6-phosphate isomerase OS=Papio anubis GN=GPI PE=3 SV=1 - [AOA0A0MUJ3_PAPAN]         | GPI       |
| AOA096NCE1 | Uncharacterized protein OS=Papio anubis GN=GPNMB PE=4 SV=1 - [AOA096NCE1_PAPAN]             | GPNMB     |
| AOA096P615 | Uncharacterized protein OS=Papio anubis GN=GRN PE=4 SV=1 - [AOA096P615_PAPAN]               | GRN       |
| AOA096POP7 | Uncharacterized protein OS=Papio anubis GN=GSN PE=4 SV=1 - [AOA096POP7_PAPAN]               | GSN       |
| AOA096NMM7 | Uncharacterized protein OS=Papio anubis GN=GSTM4 PE=4 SV=1 - [AOA096NMM7_PAPAN]             | GSTM4     |
| AOA096N1N2 | Uncharacterized protein OS=Papio anubis GN=GSTP1 PE=3 SV=1 - [AOA096N1N2_PAPAN]             | GSTP1     |
| AOA096MKX1 | Uncharacterized protein OS=Papio anubis GN=H1F0 PE=3 SV=1 - [AOA096MKX1_PAPAN]              | H1F0      |
| AOA096MY93 | Histone H2A OS=Papio anubis GN=H2AFV PE=3 SV=1 - [AOA096MY93_PAPAN]                         | H2AFV     |
| AOA096N0E8 | Core histone macro-H2A OS=Papio anubis GN=H2AFY PE=4 SV=1 - [AOA096N0E8_PAPAN]              | H2AFY     |
| AOA096MLL4 | Histone H2B OS=Papio anubis GN=H2BFS PE=3 SV=1 - [AOA096MLL4_PAPAN]                         | H2BFS     |
| P63111     | Hemoglobin subunit alpha OS=Papio anubis GN=HBA PE=2 SV=2 - [HBA_PAPAN]                     | HBA       |
| Q9TSP1     | Hemoglobin subunit beta OS=Papio anubis GN=HBB PE=2 SV=2 - [HBB_PAPAN]                      | HBB       |
| A9L8X9     | Hemoglobin subunit gamma-1 (Predicted) OS=Papio anubis GN=HBG2_1 PE=3 SV=1 - [A9L8X9_PAPAN] | HBG2_1    |
| AOA096MWC0 | Histone deacetylase OS=Papio anubis GN=HDAC1 PE=3 SV=1 - [AOA096MWC0_PAPAN]                 | HDAC1     |
| AOA096MMR8 | Uncharacterized protein OS=Papio anubis GN=HINT1 PE=4 SV=1 - [AOA096MMR8_PAPAN]             | HINT1     |
| AOA096N7S6 | Uncharacterized protein OS=Papio anubis GN=HIP1R PE=4 SV=1 - [AOA096N7S6_PAPAN]             | HIP1R     |
| AOA096NCV1 | Uncharacterized protein OS=Papio anubis GN=HIST1H1B PE=3 SV=1 - [AOA096NCV1_PAPAN]          | HIST1H1B  |
| AOA096NDC1 | Uncharacterized protein OS=Papio anubis GN=HIST1H1C PE=3 SV=1 - [AOA096NDC1_PAPAN]          | HIST1H1C  |
| AOA096NEG8 | Uncharacterized protein OS=Papio anubis GN=HIST1H1E PE=3 SV=1 - [AOA096NEG8_PAPAN]          | HIST1H1E  |
| AOA096MPD3 | Histone H3 OS=Papio anubis GN=HIST1H3I PE=3 SV=1 - [AOA096MPD3_PAPAN]                       | HIST1H3I  |
| AOA096N7J3 | Histone H4 OS=Papio anubis GN=HIST1H4K PE=3 SV=1 - [AOA096N7J3_PAPAN]                       | HIST1H4K  |
| AOA096NE00 | Histone H2A OS=Papio anubis GN=HIST2H2AB PE=3 SV=1 - [AOA096NE00_PAPAN]                     | HIST2H2AB |
| AOA096NBR7 | Histone H2A OS=Papio anubis GN=HIST2H2AC PE=3 SV=1 - [AOA096NBR7_PAPAN]                     | HIST2H2AC |
| AOA096ND12 | Uncharacterized protein OS=Papio anubis GN=HK3 PE=4 SV=1 - [AOA096ND12_PAPAN]               | HK3       |
| AOA096N6W7 | Uncharacterized protein OS=Papio anubis GN=HMBS PE=3 SV=1 - [AOA096N6W7_PAPAN]              | HMBS      |
| AOA096MZA5 | Uncharacterized protein OS=Papio anubis GN=HMGN2 PE=4 SV=1 - [AOA096MZA5_PAPAN]             | HMGN2     |
| AOA096NNP8 | Uncharacterized protein OS=Papio anubis GN=HNRNPC PE=4 SV=1 - [AOA096NNP8_PAPAN]            | HNRNPC    |
| AOA096P1W1 | Uncharacterized protein OS=Papio anubis GN=HNRNPK PE=4 SV=1 - [AOA096P1W1_PAPAN]            | HNRNPK    |
| AOA096NAP7 | Uncharacterized protein OS=Papio anubis GN=HPRT1 PE=4 SV=1 - [AOA096NAP7_PAPAN]             | HPRT1     |
| AOA096N345 | Hemopexin OS=Papio anubis GN=HPX PE=3 SV=1 - [AOA096N345_PAPAN]                             | HPX       |
| AOA096NWW6 | Uncharacterized protein OS=Papio anubis GN=HS1BP3 PE=4 SV=1 - [AOA096NWW6_PAPAN]            | HS1BP3    |
| AOA096NJT9 | Uncharacterized protein OS=Papio anubis GN=HSP90AA1 PE=3 SV=1 - [AOA096NJT9_PAPAN]          | HSP90AA1  |
| AOA096NIL6 | Uncharacterized protein OS=Papio anubis GN=HSP90AB1 PE=3 SV=1 - [AOA096NIL6_PAPAN]          | HSP90AB1  |
| AOA096MNL4 | Uncharacterized protein OS=Papio anubis GN=HSPA1L PE=3 SV=1 - [AOA096MNL4_PAPAN]            | HSPA1L    |
| AOA096MUK6 | Uncharacterized protein (Fragment) OS=Papio anubis GN=HSPA9 PE=3 SV=1 - [AOA096MUK6_PAPAN]  | HSPA9     |
| AOA096ML47 | Uncharacterized protein OS=Papio anubis GN=HSPE1 PE=3 SV=1 - [AOA096ML47_PAPAN]             | HSPE1     |
| AOA096N5L0 | Uncharacterized protein OS=Papio anubis GN=HSPG2 PE=4 SV=1 - [AOA096N5L0_PAPAN]             | HSPG2     |
| AOA096NDB1 | Uncharacterized protein (Fragment) OS=Papio anubis GN=IBSP PE=4 SV=1 - [AOA096NDB1_PAPAN]   | IBSP      |
| AOA096NTU4 | Uncharacterized protein OS=Papio anubis GN=ICAM2 PE=4 SV=1 - [AOA096NTU4_PAPAN]             | ICAM2     |
| AOA0A0MV25 | Uncharacterized protein OS=Papio anubis GN=ICAM3 PE=4 SV=1 - [AOA0A0MV25_PAPAN]             | ICAM3     |
| AOA096MWT5 | Isocitrate dehydrogenase [NADP] OS=Papio anubis GN=IDH1 PE=3 SV=1 - [AOA096MWT5_PAPAN]      | IDH1      |
| AOA096NN95 | Isocitrate dehydrogenase [NADP] OS=Papio anubis GN=IDH2 PE=3 SV=1 - [AOA096NN95_PAPAN]      | IDH2      |

|            |                                                                                                               |             |
|------------|---------------------------------------------------------------------------------------------------------------|-------------|
| A0A096N938 | Uncharacterized protein OS=Papio anubis GN=IDO1 PE=4 SV=1 - [A0A096N938_PAPAN]                                | IDO1        |
| A0A096NGA2 | Uncharacterized protein OS=Papio anubis GN=IGF1 PE=3 SV=1 - [A0A096NGA2_PAPAN]                                | IGF1        |
| A0A096NZW5 | Uncharacterized protein OS=Papio anubis GN=IGF2R PE=4 SV=1 - [A0A096NZW5_PAPAN]                               | IGF2R       |
| Q8MK66     | Insulin-like growth factor binding protein-1 (Fragment) OS=Papio anubis GN=IGFBP-1 PE=4 SV=1 - [Q8MK66_PAPAN] | IGFBP-1     |
| A0A096MWE4 | Uncharacterized protein OS=Papio anubis GN=IGFBP3 PE=4 SV=1 - [A0A096MWE4_PAPAN]                              | IGFBP3      |
| A0A096MXL3 | Uncharacterized protein OS=Papio anubis GN=IGFBP5 PE=4 SV=1 - [A0A096MXL3_PAPAN]                              | IGFBP5      |
| A0A096NK88 | Uncharacterized protein OS=Papio anubis GN=IGHM PE=4 SV=1 - [A0A096NK88_PAPAN]                                | IGHM        |
| A0A096MSA5 | Uncharacterized protein OS=Papio anubis GN=IGHV3OR15-7 PE=4 SV=1 - [A0A096MSA5_PAPAN]                         | IGHV3OR15-7 |
| A0A096NQP5 | Inosine-5'-monophosphate dehydrogenase OS=Papio anubis GN=IMPDH2 PE=3 SV=1 - [A0A096NQP5_PAPAN]               | IMPDH2      |
| A0A096NRS4 | Uncharacterized protein OS=Papio anubis GN=INPP5E PE=4 SV=1 - [A0A096NRS4_PAPAN]                              | INPP5E      |
| A0A096NNA5 | Uncharacterized protein OS=Papio anubis GN=IQGAP1 PE=4 SV=1 - [A0A096NNA5_PAPAN]                              | IQGAP1      |
| A0A0A0MWE7 | Uncharacterized protein OS=Papio anubis GN=ISYNA1 PE=4 SV=1 - [A0A0A0MWE7_PAPAN]                              | ISYNA1      |
| A0A096MMV7 | Uncharacterized protein OS=Papio anubis GN=ITGA1 PE=3 SV=1 - [A0A096MMV7_PAPAN]                               | ITGA1       |
| A0A096NH7  | Uncharacterized protein OS=Papio anubis GN=ITGAM PE=3 SV=1 - [A0A096NH7_PAPAN]                                | ITGAM       |
| A0A096P446 | Integrin beta OS=Papio anubis GN=ITGB1 PE=3 SV=1 - [A0A096P446_PAPAN]                                         | ITGB1       |
| A0A096NIC5 | Uncharacterized protein OS=Papio anubis GN=ITGB2 PE=4 SV=1 - [A0A096NIC5_PAPAN]                               | ITGB2       |
| A0A096NDX2 | Uncharacterized protein OS=Papio anubis GN=ITIH3 PE=4 SV=1 - [A0A096NDX2_PAPAN]                               | ITIH3       |
| A0A096NPZ2 | Uncharacterized protein OS=Papio anubis GN=ITIH4 PE=4 SV=1 - [A0A096NPZ2_PAPAN]                               | ITIH4       |
| A0A096MPC3 | Uncharacterized protein OS=Papio anubis GN=KBTBD7 PE=4 SV=1 - [A0A096MPC3_PAPAN]                              | KBTBD7      |
| A0A096MLE4 | Uncharacterized protein OS=Papio anubis GN=KCNAB2 PE=4 SV=1 - [A0A096MLE4_PAPAN]                              | KCNAB2      |
| A0A096NE68 | Uncharacterized protein OS=Papio anubis GN=KIAA1614 PE=4 SV=1 - [A0A096NE68_PAPAN]                            | KIAA1614    |
| A0A096NVL4 | Kinesin-like protein OS=Papio anubis GN=KIF16B PE=3 SV=1 - [A0A096NVL4_PAPAN]                                 | KIF16B      |
| A0A096N7T8 | Uncharacterized protein OS=Papio anubis GN=KNG1 PE=4 SV=1 - [A0A096N7T8_PAPAN]                                | KNG1        |
| A0A096N664 | Uncharacterized protein OS=Papio anubis GN=LAMP1 PE=4 SV=1 - [A0A096N664_PAPAN]                               | LAMP1       |
| A0A096N6N5 | Uncharacterized protein OS=Papio anubis GN=LAMP2 PE=4 SV=1 - [A0A096N6N5_PAPAN]                               | LAMP2       |
| A0A096NZI1 | Uncharacterized protein OS=Papio anubis GN=LAP3 PE=3 SV=1 - [A0A096NZI1_PAPAN]                                | LAP3        |
| A0A096P1Y5 | Uncharacterized protein OS=Papio anubis GN=LCN2 PE=3 SV=1 - [A0A096P1Y5_PAPAN]                                | LCN2        |
| A0A096MR65 | Uncharacterized protein OS=Papio anubis GN=LCP1 PE=4 SV=1 - [A0A096MR65_PAPAN]                                | LCP1        |
| A0A096NHK5 | Uncharacterized protein OS=Papio anubis GN=LEMD2 PE=4 SV=1 - [A0A096NHK5_PAPAN]                               | LEMD2       |
| B6CBS6     | Galectin OS=Papio anubis GN=LGALS1 PE=2 SV=1 - [B6CBS6_PAPAN]                                                 | LGALS1      |
| A0A096NV76 | Galectin OS=Papio anubis GN=LGALS3 PE=4 SV=1 - [A0A096NV76_PAPAN]                                             | LGALS3      |
| A0A096NT92 | Uncharacterized protein OS=Papio anubis GN=LGALS3BP PE=4 SV=1 - [A0A096NT92_PAPAN]                            | LGALS3BP    |
| A0A096P3V0 | DNA ligase OS=Papio anubis GN=LIG3 PE=3 SV=1 - [A0A096P3V0_PAPAN]                                             | LIG3        |
| A0A096MQV4 | Uncharacterized protein OS=Papio anubis GN=LMNA PE=3 SV=1 - [A0A096MQV4_PAPAN]                                | LMNA        |
| A0A096MS49 | Uncharacterized protein OS=Papio anubis GN=LMNB1 PE=3 SV=1 - [A0A096MS49_PAPAN]                               | LMNB1       |
| A0A096NZ29 | Uncharacterized protein OS=Papio anubis GN=LRR40 PE=4 SV=1 - [A0A096NZ29_PAPAN]                               | LRR40       |
| A0A0A0MVU1 | Uncharacterized protein OS=Papio anubis GN=LRR4B PE=4 SV=1 - [A0A0A0MVU1_PAPAN]                               | LRR4B       |
| A0A096NH91 | Uncharacterized protein OS=Papio anubis GN=LSM2 PE=4 SV=1 - [A0A096NH91_PAPAN]                                | LSM2        |
| A0A096NE06 | Leukotriene A(4) hydrolase OS=Papio anubis GN=LTA4H PE=3 SV=1 - [A0A096NE06_PAPAN]                            | LTA4H       |
| A0A096MZN6 | Uncharacterized protein OS=Papio anubis GN=LTF PE=3 SV=1 - [A0A096MZN6_PAPAN]                                 | LTF         |
| A0A096MQ49 | Uncharacterized protein OS=Papio anubis GN=LUM PE=4 SV=1 - [A0A096MQ49_PAPAN]                                 | LUM         |
| A0A096N1M6 | Uncharacterized protein OS=Papio anubis GN=MAGED2 PE=4 SV=1 - [A0A096N1M6_PAPAN]                              | MAGED2      |
| A0A0A0MXC9 | Alpha-mannosidase OS=Papio anubis GN=MAN2B1 PE=3 SV=1 - [A0A0A0MXC9_PAPAN]                                    | MAN2B1      |
| A0A096N5J5 | Uncharacterized protein (Fragment) OS=Papio anubis GN=MAP3K15 PE=4 SV=1 - [A0A096N5J5_PAPAN]                  | MAP3K15     |
| A0A096NQE2 | Uncharacterized protein OS=Papio anubis GN=MAPRE3 PE=4 SV=1 - [A0A096NQE2_PAPAN]                              | MAPRE3      |
| A0A096MM77 | Uncharacterized protein OS=Papio anubis GN=MARCH9 PE=4 SV=1 - [A0A096MM77_PAPAN]                              | MARCH9      |

|            |                                                                                           |           |
|------------|-------------------------------------------------------------------------------------------|-----------|
| P68084     | Myoglobin OS=Papio anubis GN=MB PE=1 SV=2 - [MYG_PAPAN]                                   | MB        |
| A0A096MX96 | Uncharacterized protein OS=Papio anubis GN=MCM9 PE=3 SV=1 - [A0A096MX96_PAPAN]            | MCM9      |
| A0A096P053 | Malate dehydrogenase OS=Papio anubis GN=MDH1 PE=3 SV=1 - [A0A096P053_PAPAN]               | MDH1      |
| A0A096NA99 | Malate dehydrogenase OS=Papio anubis GN=MDH2 PE=3 SV=1 - [A0A096NA99_PAPAN]               | MDH2      |
| A0A096N692 | Uncharacterized protein OS=Papio anubis GN=MEPE PE=4 SV=1 - [A0A096N692_PAPAN]            | MEPE      |
| A0A096NGA3 | Methionine aminopeptidase 2 OS=Papio anubis GN=METAP2 PE=3 SV=1 - [A0A096NGA3_PAPAN]      | METAP2    |
| A0A096MNV5 | Uncharacterized protein OS=Papio anubis GN=MFAP2 PE=4 SV=1 - [A0A096MNV5_PAPAN]           | MFAP2     |
| A0A096NN57 | Uncharacterized protein OS=Papio anubis GN=MFGE8 PE=4 SV=1 - [A0A096NN57_PAPAN]           | MFGE8     |
| A0A096N227 | Uncharacterized protein OS=Papio anubis GN=MGAM PE=3 SV=1 - [A0A096N227_PAPAN]            | MGAM      |
| A0A096NZ43 | Uncharacterized protein OS=Papio anubis GN=MGAT5 PE=4 SV=1 - [A0A096NZ43_PAPAN]           | MGAT5     |
| A0A096MQ98 | Uncharacterized protein OS=Papio anubis GN=MGST3 PE=4 SV=1 - [A0A096MQ98_PAPAN]           | MGST3     |
| A0A096MYZ3 | Uncharacterized protein OS=Papio anubis GN=MIA3 PE=4 SV=1 - [A0A096MYZ3_PAPAN]            | MIA3      |
| A0A096NWK7 | Uncharacterized protein OS=Papio anubis GN=MIF PE=4 SV=1 - [A0A096NWK7_PAPAN]             | MIF       |
| A0A096NQR7 | Uncharacterized protein OS=Papio anubis GN=MMP8 PE=4 SV=1 - [A0A096NQR7_PAPAN]            | MMP8      |
| A0A096NX22 | Uncharacterized protein (Fragment) OS=Papio anubis GN=MMP9 PE=4 SV=1 - [A0A096NX22_PAPAN] | MMP9      |
| A0A096NX23 | Uncharacterized protein OS=Papio anubis GN=MMP9 PE=4 SV=1 - [A0A096NX23_PAPAN]            | MMP9      |
| A0A096NQ09 | Uncharacterized protein OS=Papio anubis GN=MNDA PE=4 SV=1 - [A0A096NQ09_PAPAN]            | MNDA      |
| A0A096P4T2 | Uncharacterized protein OS=Papio anubis GN=MPO PE=4 SV=1 - [A0A096P4T2_PAPAN]             | MPO       |
| A0A096NB40 | Uncharacterized protein OS=Papio anubis GN=MRE11A PE=3 SV=1 - [A0A096NB40_PAPAN]          | MRE11A    |
| A0A096NLU0 | Uncharacterized protein OS=Papio anubis GN=MRPS18B PE=4 SV=1 - [A0A096NLU0_PAPAN]         | MRPS18B   |
| A0A096MSB9 | Uncharacterized protein OS=Papio anubis GN=MSN PE=4 SV=1 - [A0A096MSB9_PAPAN]             | MSN       |
| A0A096NJT3 | Uncharacterized protein OS=Papio anubis GN=MYH9 PE=4 SV=1 - [A0A096NJT3_PAPAN]            | MYH9      |
| A0A096NL29 | Uncharacterized protein OS=Papio anubis GN=MYLIP PE=4 SV=1 - [A0A096NL29_PAPAN]           | MYLIP     |
| A0A096NM47 | Uncharacterized protein OS=Papio anubis GN=MYO5A PE=4 SV=1 - [A0A096NM47_PAPAN]           | MYO5A     |
| A0A096NDU3 | Uncharacterized protein OS=Papio anubis GN=MYOT PE=4 SV=1 - [A0A096NDU3_PAPAN]            | MYOT      |
| A0A096NC72 | Uncharacterized protein OS=Papio anubis GN=NAAA PE=4 SV=1 - [A0A096NC72_PAPAN]            | NAAA      |
| A0A096MRP9 | Uncharacterized protein OS=Papio anubis GN=NACA PE=4 SV=1 - [A0A096MRP9_PAPAN]            | NACA      |
| A0A096NFR9 | Uncharacterized protein OS=Papio anubis GN=NCOR2 PE=4 SV=1 - [A0A096NFR9_PAPAN]           | NCOR2     |
| A0A096N6X1 | Uncharacterized protein OS=Papio anubis GN=NCSTN PE=4 SV=1 - [A0A096N6X1_PAPAN]           | NCSTN     |
| A0A096NLV7 | Uncharacterized protein OS=Papio anubis GN=NDE1 PE=4 SV=1 - [A0A096NLV7_PAPAN]            | NDE1      |
| A0A096NUU6 | Uncharacterized protein OS=Papio anubis GN=NEMF PE=4 SV=1 - [A0A096NUU6_PAPAN]            | NEMF      |
| A0A096P4M5 | Nucleoside diphosphate kinase OS=Papio anubis GN=NME1-NME2 PE=3 SV=1 - [A0A096P4M5_PAPAN] | NME1-NME2 |
| A0A096ML14 | Nucleoside diphosphate kinase OS=Papio anubis GN=NME2 PE=3 SV=1 - [A0A096ML14_PAPAN]      | NME2      |
| A0A096NTZ1 | Uncharacterized protein OS=Papio anubis GN=NOL11 PE=4 SV=1 - [A0A096NTZ1_PAPAN]           | NOL11     |
| A0A096NSC1 | Uncharacterized protein OS=Papio anubis GN=NPC2 PE=4 SV=1 - [A0A096NSC1_PAPAN]            | NPC2      |
| A0A096P236 | Uncharacterized protein OS=Papio anubis GN=OGN PE=4 SV=1 - [A0A096P236_PAPAN]             | OGN       |
| A0A096P237 | Uncharacterized protein OS=Papio anubis GN=OMD PE=4 SV=1 - [A0A096P237_PAPAN]             | OMD       |
| A0A096POS9 | Alpha-1-acid glycoprotein OS=Papio anubis GN=ORM1 PE=3 SV=1 - [A0A096POS9_PAPAN]          | ORM1      |
| A0A096MNK2 | Uncharacterized protein OS=Papio anubis GN=OTOGL PE=4 SV=1 - [A0A096MNK2_PAPAN]           | OTOGL     |
| A0A096NCN0 | Uncharacterized protein OS=Papio anubis GN=OVOL1 PE=4 SV=1 - [A0A096NCN0_PAPAN]           | OVOL1     |
| A0A096NTJ3 | Protein disulfide-isomerase OS=Papio anubis GN=P4HB PE=3 SV=1 - [A0A096NTJ3_PAPAN]        | P4HB      |
| Q95H98     | MHC class I antigen (Fragment) OS=Papio anubis GN=Paan-AG PE=2 SV=1 - [Q95H98_PAPAN]      | Paan-AG   |
| A0A096NR16 | Uncharacterized protein OS=Papio anubis GN=PFAH1B2 PE=4 SV=1 - [A0A096NR16_PAPAN]         | PFAH1B2   |
| A0A096NHF6 | Uncharacterized protein OS=Papio anubis GN=PALB2 PE=4 SV=1 - [A0A096NHF6_PAPAN]           | PALB2     |
| A0A096MUW0 | Poly [ADP-ribose] polymerase OS=Papio anubis GN=PARP1 PE=4 SV=1 - [A0A096MUW0_PAPAN]      | PARP1     |
| A0A096MZ42 | Poly [ADP-ribose] polymerase OS=Papio anubis GN=PARP14 PE=4 SV=1 - [A0A096MZ42_PAPAN]     | PARP14    |
| A0A096NNW4 | Uncharacterized protein OS=Papio anubis GN=PCOLCE PE=4 SV=1 - [A0A096NNW4_PAPAN]          | PCOLCE    |
| A0A096MPL7 | Uncharacterized protein OS=Papio anubis GN=PCSK1 PE=3 SV=1 - [A0A096MPL7_PAPAN]           | PCSK1     |

|            |                                                                                                        |         |
|------------|--------------------------------------------------------------------------------------------------------|---------|
| A0A096MLR2 | Uncharacterized protein OS=Papio anubis GN=PCYOX1L PE=4 SV=1 - [A0A096MLR2_PAPAN]                      | PCYOX1L |
| A9X1C0     | Protein disulfide-isomerase OS=Papio anubis GN=PDIA3 PE=3 SV=1 - [A9X1C0_PAPAN]                        | PDIA3   |
| A0A096NE18 | Protein disulfide-isomerase (Fragment) OS=Papio anubis GN=PDIA4 PE=3 SV=1 - [A0A096NE18_PAPAN]         | PDIA4   |
| A0A096NJ27 | Uncharacterized protein OS=Papio anubis GN=PDIA6 PE=3 SV=1 - [A0A096NJ27_PAPAN]                        | PDIA6   |
| A0A096MXH7 | Uncharacterized protein OS=Papio anubis GN=PDLIM5 PE=4 SV=1 - [A0A096MXH7_PAPAN]                       | PDLIM5  |
| A0A096NIL7 | Uncharacterized protein OS=Papio anubis GN=PDXK PE=4 SV=1 - [A0A096NIL7_PAPAN]                         | PDXK    |
| A0A096NYF3 | Uncharacterized protein OS=Papio anubis GN=PDZRN4 PE=4 SV=1 - [A0A096NYF3_PAPAN]                       | PDZRN4  |
| A0A096NTV0 | Uncharacterized protein OS=Papio anubis GN=PECAM1 PE=4 SV=1 - [A0A096NTV0_PAPAN]                       | PECAM1  |
| A0A096N568 | C-X-C motif chemokine OS=Papio anubis GN=PF4 PE=3 SV=1 - [A0A096N568_PAPAN]                            | PF4     |
| A0A096NIG0 | ATP-dependent 6-phosphofructokinase OS=Papio anubis GN=PFKL PE=3 SV=1 - [A0A096NIG0_PAPAN]             | PFKL    |
| A0A096P2I7 | Profilin (Fragment) OS=Papio anubis GN=PFN1 PE=3 SV=1 - [A0A096P2I7_PAPAN]                             | PFN1    |
| A0A096MKU8 | Uncharacterized protein OS=Papio anubis GN=PGAM4 PE=3 SV=1 - [A0A096MKU8_PAPAN]                        | PGAM4   |
| A0A096MZJ0 | Uncharacterized protein OS=Papio anubis GN=PGD PE=4 SV=1 - [A0A096MZJ0_PAPAN]                          | PGD     |
| A0A096P453 | Uncharacterized protein OS=Papio anubis GN=PHB PE=4 SV=1 - [A0A096P453_PAPAN]                          | PHB     |
| A0A096NG14 | Uncharacterized protein OS=Papio anubis GN=PIK3CB PE=4 SV=1 - [A0A096NG14_PAPAN]                       | PIK3CB  |
| A0A096NXR9 | Uncharacterized protein OS=Papio anubis GN=PKD2 PE=4 SV=1 - [A0A096NXR9_PAPAN]                         | PKD2    |
| A0A096N5Z8 | Pyruvate kinase OS=Papio anubis GN=PKLR PE=3 SV=1 - [A0A096N5Z8_PAPAN]                                 | PKLR    |
| A0A096NMM2 | Pyruvate kinase OS=Papio anubis GN=PKM PE=3 SV=1 - [A0A096NMM2_PAPAN]                                  | PKM     |
| A0A096MRC1 | Uncharacterized protein OS=Papio anubis GN=PLBD1 PE=4 SV=1 - [A0A096MRC1_PAPAN]                        | PLBD1   |
| A0A096MZ59 | Uncharacterized protein OS=Papio anubis GN=PLEKHG1 PE=4 SV=1 - [A0A096MZ59_PAPAN]                      | PLEKHG1 |
| A0A096P027 | Uncharacterized protein OS=Papio anubis GN=PLSCR4 PE=4 SV=1 - [A0A096P027_PAPAN]                       | PLSCR4  |
| A0A096NAQ6 | Uncharacterized protein OS=Papio anubis GN=PLXNA2 PE=4 SV=1 - [A0A096NAQ6_PAPAN]                       | PLXNA2  |
| A0A096NMP6 | Uncharacterized protein OS=Papio anubis GN=PML PE=4 SV=1 - [A0A096NMP6_PAPAN]                          | PML     |
| A0A096NZW8 | DNA-directed RNA polymerase OS=Papio anubis GN=POLR1A PE=3 SV=1 - [A0A096NZW8_PAPAN]                   | POLR1A  |
| A0A096N908 | Uncharacterized protein OS=Papio anubis GN=PPAN PE=4 SV=1 - [A0A096N908_PAPAN]                         | PPAN    |
| A0A096MNQ3 | C-X-C motif chemokine OS=Papio anubis GN=PPBP PE=3 SV=1 - [A0A096MNQ3_PAPAN]                           | PPBP    |
| A0A096NMB5 | Peptidyl-prolyl cis-trans isomerase OS=Papio anubis GN=PPIB PE=3 SV=1 - [A0A096NMB5_PAPAN]             | PPIB    |
| A0A096NE84 | Uncharacterized protein OS=Papio anubis GN=PPM1J PE=4 SV=1 - [A0A096NE84_PAPAN]                        | PPM1J   |
| A0A0A0MUP1 | Uncharacterized protein OS=Papio anubis GN=PPP6R1 PE=4 SV=1 - [A0A0A0MUP1_PAPAN]                       | PPP6R1  |
| A0A096NP25 | Uncharacterized protein OS=Papio anubis GN=PRDX1 PE=4 SV=1 - [A0A096NP25_PAPAN]                        | PRDX1   |
| A0A096NTY3 | Uncharacterized protein OS=Papio anubis GN=PRDX3 PE=4 SV=1 - [A0A096NTY3_PAPAN]                        | PRDX3   |
| A0A096N7A2 | Uncharacterized protein OS=Papio anubis GN=PRDX4 PE=4 SV=1 - [A0A096N7A2_PAPAN]                        | PRDX4   |
| A0A096NPR2 | Uncharacterized protein OS=Papio anubis GN=PRELP PE=4 SV=1 - [A0A096NPR2_PAPAN]                        | PRELP   |
| A0A096MZN1 | Uncharacterized protein OS=Papio anubis GN=PRG2 PE=4 SV=1 - [A0A096MZN1_PAPAN]                         | PRG2    |
| A0A096MVA7 | Uncharacterized protein OS=Papio anubis GN=PROC PE=3 SV=1 - [A0A096MVA7_PAPAN]                         | PROC    |
| A0A096NFY7 | Uncharacterized protein OS=Papio anubis GN=PROZ PE=3 SV=1 - [A0A096NFY7_PAPAN]                         | PROZ    |
| A0A096MNC3 | Uncharacterized protein OS=Papio anubis GN=PRPS2 PE=3 SV=1 - [A0A096MNC3_PAPAN]                        | PRPS2   |
| A0A0A0MXJ3 | Uncharacterized protein OS=Papio anubis GN=PRSS57 PE=3 SV=1 - [A0A0A0MXJ3_PAPAN]                       | PRSS57  |
| A0A0A0MXF9 | Uncharacterized protein OS=Papio anubis GN=PRTN3 PE=3 SV=1 - [A0A0A0MXF9_PAPAN]                        | PRTN3   |
| A0A096P4S2 | Uncharacterized protein OS=Papio anubis GN=PSAP PE=4 SV=1 - [A0A096P4S2_PAPAN]                         | PSAP    |
| A0A096NUL3 | Proteasome subunit alpha type OS=Papio anubis GN=PSMA6 PE=3 SV=1 - [A0A096NUL3_PAPAN]                  | PSMA6   |
| A0A096NND3 | Proteasome subunit alpha type OS=Papio anubis GN=PSMA7 PE=3 SV=1 - [A0A096NND3_PAPAN]                  | PSMA7   |
| A0A096NVZ7 | Proteasome subunit beta type OS=Papio anubis GN=PSMB1 PE=3 SV=1 - [A0A096NVZ7_PAPAN]                   | PSMB1   |
| A0A096MX69 | Proteasome subunit beta type OS=Papio anubis GN=PSMB2 PE=3 SV=1 - [A0A096MX69_PAPAN]                   | PSMB2   |
| A0A096MMM9 | Tyrosine-protein phosphatase non-receptor type OS=Papio anubis GN=PTPN6 PE=3 SV=1 - [A0A096MMM9_PAPAN] | PTPN6   |
| A0A096ND26 | Uncharacterized protein OS=Papio anubis GN=PTPRC PE=4 SV=1 - [A0A096ND26_PAPAN]                        | PTPRC   |
| A0A096N2L9 | Uncharacterized protein OS=Papio anubis GN=PTPRF PE=4 SV=1 - [A0A096N2L9_PAPAN]                        | PTPRF   |



|            |                                                                                                                                 |           |
|------------|---------------------------------------------------------------------------------------------------------------------------------|-----------|
| AOA096NOW7 | Uncharacterized protein OS=Papio anubis GN=PTX3 PE=4 SV=1 - [AOA096NOW7_PAPAN]                                                  | PTX3      |
| AOA096MPP7 | Uncharacterized protein (Fragment) OS=Papio anubis GN=PURA PE=4 SV=1 - [AOA096MPP7_PAPAN]                                       | PURA      |
| AOA096NUY6 | Alpha-1,4 glucan phosphorylase OS=Papio anubis GN=PYGL PE=3 SV=1 - [AOA096NUY6_PAPAN]                                           | PYGL      |
| AOA096P3V4 | Uncharacterized protein OS=Papio anubis GN=RAB18 PE=4 SV=1 - [AOA096P3V4_PAPAN]                                                 | RAB18     |
| AOA096MM27 | Uncharacterized protein OS=Papio anubis GN=RAD54L PE=4 SV=1 - [AOA096MM27_PAPAN]                                                | RAD54L    |
| AOA096NUU0 | Uncharacterized protein OS=Papio anubis GN=RALY PE=4 SV=1 - [AOA096NUU0_PAPAN]                                                  | RALY      |
| AOA096MZ72 | Uncharacterized protein OS=Papio anubis GN=RAP1B PE=4 SV=1 - [AOA096MZ72_PAPAN]                                                 | RAP1B     |
| AOA096NV30 | Uncharacterized protein OS=Papio anubis GN=RBCK1 PE=4 SV=1 - [AOA096NV30_PAPAN]                                                 | RBCK1     |
| AOA096P083 | Uncharacterized protein OS=Papio anubis GN=RBKS PE=3 SV=1 - [AOA096P083_PAPAN]                                                  | RBKS      |
| BOCM83     | RNA binding motif protein 12 (Predicted) OS=Papio anubis GN=RBM12 PE=4 SV=1 - [BOCM83_PAPAN]                                    | RBM12     |
| AOA0A0MU90 | Uncharacterized protein OS=Papio anubis GN=RETN PE=4 SV=1 - [AOA0A0MU90_PAPAN]                                                  | RETN      |
| AOA096N0B7 | Uncharacterized protein OS=Papio anubis GN=RFX1 PE=4 SV=1 - [AOA096N0B7_PAPAN]                                                  | RFX1      |
| AOA096N7P2 | Uncharacterized protein OS=Papio anubis GN=RHOA PE=4 SV=1 - [AOA096N7P2_PAPAN]                                                  | RHOA      |
| AOA096MTW5 | Uncharacterized protein OS=Papio anubis GN=RNASE3 PE=3 SV=1 - [AOA096MTW5_PAPAN]                                                | RNASE3    |
| AOA096NNL9 | Uncharacterized protein OS=Papio anubis GN=RNASE4 PE=3 SV=1 - [AOA096NNL9_PAPAN]                                                | RNASE4    |
| AOA096NNM2 | Uncharacterized protein OS=Papio anubis GN=RNASE6 PE=3 SV=1 - [AOA096NNM2_PAPAN]                                                | RNASE6    |
| AOA096N0H3 | Uncharacterized protein OS=Papio anubis GN=RNASET2 PE=3 SV=1 - [AOA096N0H3_PAPAN]                                               | RNASET2   |
| AOA096NEY5 | Uncharacterized protein OS=Papio anubis GN=ROPN1 PE=4 SV=1 - [AOA096NEY5_PAPAN]                                                 | ROPN1     |
| AOA096N5R7 | Uncharacterized protein OS=Papio anubis GN=RPIA PE=3 SV=1 - [AOA096N5R7_PAPAN]                                                  | RPIA      |
| AOA096MMG6 | Uncharacterized protein OS=Papio anubis GN=RPL10L PE=4 SV=1 - [AOA096MMG6_PAPAN]                                                | RPL10L    |
| AOA096NL69 | Uncharacterized protein OS=Papio anubis GN=RPL14 PE=4 SV=1 - [AOA096NL69_PAPAN]                                                 | RPL14     |
| AOA096MM10 | Ribosomal protein L15 OS=Papio anubis GN=RPL15 PE=3 SV=1 - [AOA096MM10_PAPAN]                                                   | RPL15     |
| AOA096MM41 | Ribosomal protein L19 OS=Papio anubis GN=RPL19 PE=3 SV=1 - [AOA096MM41_PAPAN]                                                   | RPL19     |
| AOA096N9H3 | Uncharacterized protein OS=Papio anubis GN=RPL23 PE=3 SV=1 - [AOA096N9H3_PAPAN]                                                 | RPL23     |
| AOA096N641 | Uncharacterized protein OS=Papio anubis GN=RPL35 PE=3 SV=1 - [AOA096N641_PAPAN]                                                 | RPL35     |
| AOA096N921 | Uncharacterized protein OS=Papio anubis GN=RPL8 PE=3 SV=1 - [AOA096N921_PAPAN]                                                  | RPL8      |
| AOA096MMQ6 | Uncharacterized protein OS=Papio anubis GN=RPLP1 PE=3 SV=1 - [AOA096MMQ6_PAPAN]                                                 | RPLP1     |
| AOA096MPI1 | Dolichyl-diphosphooligosaccharide--protein glycosyltransferase subunit 1 OS=Papio anubis GN=RPN1 PE=3 SV=1 - [AOA096MPI1_PAPAN] | RPN1      |
| AOA096NLX5 | Uncharacterized protein OS=Papio anubis GN=RPN2 PE=4 SV=1 - [AOA096NLX5_PAPAN]                                                  | RPN2      |
| AOA096N9U5 | Uncharacterized protein OS=Papio anubis GN=RPS13 PE=3 SV=1 - [AOA096N9U5_PAPAN]                                                 | RPS13     |
| AOA096NEG6 | Uncharacterized protein OS=Papio anubis GN=RPS17 PE=3 SV=1 - [AOA096NEG6_PAPAN]                                                 | RPS17     |
| AOA096MLJ2 | Uncharacterized protein OS=Papio anubis GN=RPS19 PE=4 SV=1 - [AOA096MLJ2_PAPAN]                                                 | RPS19     |
| AOA096N3A5 | Uncharacterized protein (Fragment) OS=Papio anubis GN=RPS20 PE=3 SV=1 - [AOA096N3A5_PAPAN]                                      | RPS20     |
| AOA096NCF4 | Uncharacterized protein OS=Papio anubis GN=RPS28 PE=3 SV=1 - [AOA096NCF4_PAPAN]                                                 | RPS28     |
| AOA096NG66 | Uncharacterized protein OS=Papio anubis GN=RPS5 PE=3 SV=1 - [AOA096NG66_PAPAN]                                                  | RPS5      |
| AOA096N4U1 | Uncharacterized protein OS=Papio anubis GN=RPS7 PE=4 SV=1 - [AOA096N4U1_PAPAN]                                                  | RPS7      |
| AOA096NEN2 | Protein S100 OS=Papio anubis GN=S100A4 PE=3 SV=1 - [AOA096NEN2_PAPAN]                                                           | S100A4    |
| AOA096N1R3 | Protein S100 OS=Papio anubis GN=S100A9 PE=3 SV=1 - [AOA096N1R3_PAPAN]                                                           | S100A9    |
| AOA096MVM0 | Uncharacterized protein OS=Papio anubis GN=SACS PE=4 SV=1 - [AOA096MVM0_PAPAN]                                                  | SACS      |
| AOA096NMU2 | Uncharacterized protein OS=Papio anubis GN=SCAPER PE=4 SV=1 - [AOA096NMU2_PAPAN]                                                | SCAPER    |
| AOA096MWL2 | Uncharacterized protein OS=Papio anubis GN=SDCBP PE=4 SV=1 - [AOA096MWL2_PAPAN]                                                 | SDCBP     |
| A9X1A2     | Selenium binding protein 1 (Predicted) OS=Papio anubis GN=SELENBP1 PE=4 SV=1 - [A9X1A2_PAPAN]                                   | SELENBP1  |
| AOA096NJ1  | Alpha-1-antitrypsin OS=Papio anubis GN=SERPINA1 PE=3 SV=1 - [AOA096NJ1_PAPAN]                                                   | SERPINA1  |
| AOA096NJI7 | Uncharacterized protein OS=Papio anubis GN=SERPINA10 PE=3 SV=1 - [AOA096NJI7_PAPAN]                                             | SERPINA10 |
| AOA096NJK2 | Uncharacterized protein OS=Papio anubis GN=SERPINA5 PE=3 SV=1 - [AOA096NJK2_PAPAN]                                              | SERPINA5  |
| AOA096MR94 | Uncharacterized protein OS=Papio anubis GN=SERPINA7 PE=3 SV=1 - [AOA096MR94_PAPAN]                                              | SERPINA7  |
| AOA096NJJ4 | Uncharacterized protein OS=Papio anubis GN=SERPINA9 PE=3 SV=1 - [AOA096NJJ4_PAPAN]                                              | SERPINA9  |

|            |                                                                                                                  |           |
|------------|------------------------------------------------------------------------------------------------------------------|-----------|
| A0A096NKJ7 | Uncharacterized protein OS=Papio anubis GN=SERPINB1 PE=3 SV=1 - [A0A096NKJ7_PAPAN]                               | SERPINB1  |
| A0A096ML06 | Serpin B10 OS=Papio anubis GN=SERPINB10 PE=3 SV=1 - [A0A096ML06_PAPAN]                                           | SERPINB10 |
| A9RA95     | Serpin peptidase inhibitor, clade B, member 2 (Predicted) OS=Papio anubis GN=SERPINB2 PE=3 SV=1 - [A9RA95_PAPAN] | SERPINB2  |
| A0A096NKK2 | Uncharacterized protein OS=Papio anubis GN=SERPINB6 PE=3 SV=1 - [A0A096NKK2_PAPAN]                               | SERPINB6  |
| A0A096N139 | Uncharacterized protein OS=Papio anubis GN=SERPINB8 PE=3 SV=1 - [A0A096N139_PAPAN]                               | SERPINB8  |
| A0A096NKK0 | Uncharacterized protein OS=Papio anubis GN=SERPINB9 PE=3 SV=1 - [A0A096NKK0_PAPAN]                               | SERPINB9  |
| A0A096N0R9 | Uncharacterized protein OS=Papio anubis GN=SERPINC1 PE=3 SV=1 - [A0A096N0R9_PAPAN]                               | SERPINC1  |
| A0A096NS83 | Uncharacterized protein OS=Papio anubis GN=SERPIND1 PE=3 SV=1 - [A0A096NS83_PAPAN]                               | SERPIND1  |
| A0A096NYG6 | Uncharacterized protein OS=Papio anubis GN=SERPINE2 PE=3 SV=1 - [A0A096NYG6_PAPAN]                               | SERPINE2  |
| A0A096P2A8 | Uncharacterized protein OS=Papio anubis GN=SERPINF1 PE=3 SV=1 - [A0A096P2A8_PAPAN]                               | SERPINF1  |
| A0A096P2A7 | Uncharacterized protein OS=Papio anubis GN=SERPINF2 PE=3 SV=1 - [A0A096P2A7_PAPAN]                               | SERPINF2  |
| A0A096MY41 | Uncharacterized protein OS=Papio anubis GN=SERPING1 PE=3 SV=1 - [A0A096MY41_PAPAN]                               | SERPING1  |
| A0A096NJ16 | Uncharacterized protein (Fragment) OS=Papio anubis GN=SH3BGR PE=4 SV=1 - [A0A096NJ16_PAPAN]                      | SH3BGR    |
| A0A096MUM5 | E3 ubiquitin-protein ligase OS=Papio anubis GN=SLAH2 PE=3 SV=1 - [A0A096MUM5_PAPAN]                              | SLAH2     |
| A0A096N281 | Uncharacterized protein OS=Papio anubis GN=SLC30A5 PE=4 SV=1 - [A0A096N281_PAPAN]                                | SLC30A5   |
| A0A096NF26 | Sodium/hydrogen exchanger OS=Papio anubis GN=SLC9A2 PE=3 SV=1 - [A0A096NF26_PAPAN]                               | SLC9A2    |
| A0A096MZX1 | Solute carrier organic anion transporter family member OS=Papio anubis GN=SLCO5A1 PE=3 SV=1 - [A0A096MZX1_PAPAN] | SLCO5A1   |
| A0A096P5X6 | Uncharacterized protein OS=Papio anubis GN=SLIT1 PE=4 SV=1 - [A0A096P5X6_PAPAN]                                  | SLIT1     |
| A0A096NRG0 | Uncharacterized protein OS=Papio anubis GN=SMG1 PE=4 SV=1 - [A0A096NRG0_PAPAN]                                   | SMG1      |
| A0A096NV72 | Small nuclear ribonucleoprotein-associated protein OS=Papio anubis GN=SNRPB PE=3 SV=1 - [A0A096NV72_PAPAN]       | SNRPB     |
| A0A096MSD9 | Uncharacterized protein OS=Papio anubis GN=SNRPD1 PE=4 SV=1 - [A0A096MSD9_PAPAN]                                 | SNRPD1    |
| A0A096N0Y6 | Uncharacterized protein OS=Papio anubis GN=SNRPD2 PE=4 SV=1 - [A0A096N0Y6_PAPAN]                                 | SNRPD2    |
| A0A096NW53 | Uncharacterized protein OS=Papio anubis GN=SNRPD3 PE=4 SV=1 - [A0A096NW53_PAPAN]                                 | SNRPD3    |
| A0A096N368 | Uncharacterized protein OS=Papio anubis GN=SNRPE PE=4 SV=1 - [A0A096N368_PAPAN]                                  | SNRPE     |
| A0A096NQK0 | Superoxide dismutase [Cu-Zn] OS=Papio anubis GN=SOD1 PE=3 SV=1 - [A0A096NQK0_PAPAN]                              | SOD1      |
| A0A096MTR8 | Superoxide dismutase OS=Papio anubis GN=SOD2 PE=3 SV=1 - [A0A096MTR8_PAPAN]                                      | SOD2      |
| A0A096NYX7 | Superoxide dismutase [Cu-Zn] OS=Papio anubis GN=SOD3 PE=3 SV=1 - [A0A096NYX7_PAPAN]                              | SOD3      |
| A0A096P5Y4 | Uncharacterized protein OS=Papio anubis GN=SOST PE=4 SV=1 - [A0A096P5Y4_PAPAN]                                   | SOST      |
| A0A096N662 | Uncharacterized protein OS=Papio anubis GN=SPAG17 PE=4 SV=1 - [A0A096N662_PAPAN]                                 | SPAG17    |
| A0A096MNI1 | Uncharacterized protein OS=Papio anubis GN=SPARC PE=4 SV=1 - [A0A096MNI1_PAPAN]                                  | SPARC     |
| A0A096MUZ5 | Uncharacterized protein OS=Papio anubis GN=SPP1 PE=4 SV=1 - [A0A096MUZ5_PAPAN]                                   | SPP1      |
| A0A096N1D3 | Uncharacterized protein OS=Papio anubis GN=SPP2 PE=4 SV=1 - [A0A096N1D3_PAPAN]                                   | SPP2      |
| A0A096NVL3 | Uncharacterized protein OS=Papio anubis GN=SPTB PE=4 SV=1 - [A0A096NVL3_PAPAN]                                   | SPTB      |
| A0A096MN41 | Uncharacterized protein OS=Papio anubis GN=SRPX PE=4 SV=1 - [A0A096MN41_PAPAN]                                   | SRPX      |
| A0A096NV38 | Sulfiredoxin OS=Papio anubis GN=SRXN1 PE=3 SV=1 - [A0A096NV38_PAPAN]                                             | SRXN1     |
| A0A096MZ89 | Uncharacterized protein OS=Papio anubis GN=STAB1 PE=4 SV=1 - [A0A096MZ89_PAPAN]                                  | STAB1     |
| A0A096NZ96 | Uncharacterized protein OS=Papio anubis GN=STK39 PE=4 SV=1 - [A0A096NZ96_PAPAN]                                  | STK39     |
| A0A096POP4 | Uncharacterized protein OS=Papio anubis GN=STOM PE=4 SV=1 - [A0A096POP4_PAPAN]                                   | STOM      |
| A0A096MQ83 | Uncharacterized protein OS=Papio anubis GN=SUB1 PE=4 SV=1 - [A0A096MQ83_PAPAN]                                   | SUB1      |
| A0A096N709 | Transaldolase OS=Papio anubis GN=TALDO1 PE=3 SV=1 - [A0A096N709_PAPAN]                                           | TALDO1    |
| A0A096N2M9 | Uncharacterized protein OS=Papio anubis GN=TBC1D31 PE=4 SV=1 - [A0A096N2M9_PAPAN]                                | TBC1D31   |
| A0A096MUJ2 | Uncharacterized protein OS=Papio anubis GN=TBX22 PE=4 SV=1 - [A0A096MUJ2_PAPAN]                                  | TBX22     |
| A0A0A7RNI8 | Transferrin OS=Papio anubis GN=TF PE=2 SV=1 - [A0A0A7RNI8_PAPAN]                                                 | TF        |
| A0A096N4M5 | Uncharacterized protein OS=Papio anubis GN=TFRC PE=4 SV=1 - [A0A096N4M5_PAPAN]                                   | TFRC      |
| A0A096NTD7 | Uncharacterized protein OS=Papio anubis GN=THBS1 PE=4 SV=1 - [A0A096NTD7_PAPAN]                                  | THBS1     |
| A0A096N7S0 | Uncharacterized protein OS=Papio anubis GN=THY1 PE=4 SV=1 - [A0A096N7S0_PAPAN]                                   | THY1      |

|            |                                                                                                         |          |
|------------|---------------------------------------------------------------------------------------------------------|----------|
| A0A096MXL0 | Transketolase OS=Papio anubis GN=TKT PE=3 SV=1 - [A0A096MXL0_PAPAN]                                     | TKT      |
| A0A096P174 | Uncharacterized protein OS=Papio anubis GN=TLN1 PE=4 SV=1 - [A0A096P174_PAPAN]                          | TLN1     |
| A0A096MPZ9 | Uncharacterized protein OS=Papio anubis GN=TMEM132D PE=4 SV=1 - [A0A096MPZ9_PAPAN]                      | TMEM132D |
| A0A096NJB5 | Uncharacterized protein OS=Papio anubis GN=TNFAIP2 PE=4 SV=1 - [A0A096NJB5_PAPAN]                       | TNFAIP2  |
| A0A096MW11 | Uncharacterized protein OS=Papio anubis GN=TNFSF11 PE=4 SV=1 - [A0A096MW11_PAPAN]                       | TNFSF11  |
| A0A096NRU5 | Uncharacterized protein OS=Papio anubis GN=TOB2 PE=4 SV=1 - [A0A096NRU5_PAPAN]                          | TOB2     |
| A0A096MV59 | Uncharacterized protein OS=Papio anubis GN=TOPAZ1 PE=4 SV=1 - [A0A096MV59_PAPAN]                        | TOPAZ1   |
| A0A096MQ92 | Uncharacterized protein OS=Papio anubis GN=TPP1 PE=4 SV=1 - [A0A096MQ92_PAPAN]                          | TPP1     |
| A0A096N7V8 | Uncharacterized protein OS=Papio anubis GN=TRIM11 PE=4 SV=1 - [A0A096N7V8_PAPAN]                        | TRIM11   |
| A0A096MS07 | Uncharacterized protein (Fragment) OS=Papio anubis GN=TTC39C PE=4 SV=1 - [A0A096MS07_PAPAN]             | TTC39C   |
| A0A096MW20 | Transthyretin OS=Papio anubis GN=TTR PE=3 SV=1 - [A0A096MW20_PAPAN]                                     | TTR      |
| A0A096N5J7 | Uncharacterized protein OS=Papio anubis GN=TUBA1C PE=3 SV=1 - [A0A096N5J7_PAPAN]                        | TUBA1C   |
| A0A096NMK4 | Uncharacterized protein OS=Papio anubis GN=UACA PE=4 SV=1 - [A0A096NMK4_PAPAN]                          | UACA     |
| A0A096N3N1 | Uncharacterized protein OS=Papio anubis GN=UBE3D PE=4 SV=1 - [A0A096N3N1_PAPAN]                         | UBE3D    |
| A0A096NWC2 | Uroporphyrinogen decarboxylase OS=Papio anubis GN=UROD PE=3 SV=1 - [A0A096NWC2_PAPAN]                   | UROD     |
| A0A096P5X1 | Uncharacterized protein OS=Papio anubis GN=VAT1 PE=4 SV=1 - [A0A096P5X1_PAPAN]                          | VAT1     |
| A0A096MKK5 | Uncharacterized protein OS=Papio anubis GN=VCAM1 PE=4 SV=1 - [A0A096MKK5_PAPAN]                         | VCAM1    |
| A0A096P4K3 | Uncharacterized protein OS=Papio anubis GN=VCL PE=4 SV=1 - [A0A096P4K3_PAPAN]                           | VCL      |
| A0A096P194 | Uncharacterized protein OS=Papio anubis GN=VCP PE=3 SV=1 - [A0A096P194_PAPAN]                           | VCP      |
| A0A096NAT2 | Uncharacterized protein (Fragment) OS=Papio anubis GN=VDAC1 PE=4 SV=1 - [A0A096NAT2_PAPAN]              | VDAC1    |
| A0A096P4J4 | Uncharacterized protein OS=Papio anubis GN=VDAC2 PE=4 SV=1 - [A0A096P4J4_PAPAN]                         | VDAC2    |
| A0A096NQL9 | Uncharacterized protein OS=Papio anubis GN=VDAC3 PE=4 SV=1 - [A0A096NQL9_PAPAN]                         | VDAC3    |
| A0A096NM92 | Uncharacterized protein OS=Papio anubis GN=VPS13C PE=4 SV=1 - [A0A096NM92_PAPAN]                        | VPS13C   |
| A0A096P388 | Uncharacterized protein OS=Papio anubis GN=VTN PE=4 SV=1 - [A0A096P388_PAPAN]                           | VTN      |
| A0A096NZF1 | Uncharacterized protein OS=Papio anubis GN=WDR1 PE=4 SV=1 - [A0A096NZF1_PAPAN]                          | WDR1     |
| A0A096NMV6 | Uncharacterized protein OS=Papio anubis GN=WDR61 PE=4 SV=1 - [A0A096NMV6_PAPAN]                         | WDR61    |
| A0A096NU68 | Histone-lysine N-methyltransferase OS=Papio anubis GN=WHSC1 PE=4 SV=1 - [A0A096NU68_PAPAN]              | WHSC1    |
| A0A096NKA5 | Uncharacterized protein OS=Papio anubis GN=ZC3H7B PE=4 SV=1 - [A0A096NKA5_PAPAN]                        | ZC3H7B   |
| A0A096NDY5 | Palmitoyltransferase OS=Papio anubis GN=ZDHHC13 PE=3 SV=1 - [A0A096NDY5_PAPAN]                          | ZDHHC13  |
| A0A096NDA6 | Zinc finger MYND domain-containing protein 10 OS=Papio anubis GN=ZMYND10 PE=3 SV=1 - [A0A096NDA6_PAPAN] | ZMYND10  |
| A0A0A0MUG9 | Uncharacterized protein OS=Papio anubis GN=ZNF536 PE=4 SV=1 - [A0A0A0MUG9_PAPAN]                        | ZNF536   |
| A0A096N3S1 | Uncharacterized protein OS=Papio anubis GN=ZNF589 PE=4 SV=1 - [A0A096N3S1_PAPAN]                        | ZNF589   |
| A0A096MQJ3 | Uncharacterized protein (Fragment) OS=Papio anubis GN=ZNF596 PE=4 SV=1 - [A0A096MQJ3_PAPAN]             | ZNF596   |
| A0A096MWE1 | Uncharacterized protein OS=Papio anubis GN=ZUFSP PE=4 SV=1 - [A0A096MWE1_PAPAN]                         | ZUFSP    |
| A0A096P2F2 | Uncharacterized protein OS=Papio anubis GN=ZZEF1 PE=4 SV=1 - [A0A096P2F2_PAPAN]                         | ZZEF1    |
| A0A096MRZ4 | Uncharacterized protein OS=Papio anubis PE=4 SV=1 - [A0A096MRZ4_PAPAN]                                  |          |
| A0A096N798 | Uncharacterized protein OS=Papio anubis PE=4 SV=1 - [A0A096N798_PAPAN]                                  |          |
| A0A096N8S4 | Uncharacterized protein OS=Papio anubis PE=3 SV=1 - [A0A096N8S4_PAPAN]                                  |          |
| A0A096NA22 | Uncharacterized protein OS=Papio anubis PE=3 SV=1 - [A0A096NA22_PAPAN]                                  |          |
| A0A096NCW1 | Uncharacterized protein (Fragment) OS=Papio anubis PE=4 SV=1 - [A0A096NCW1_PAPAN]                       |          |
| A0A096NH99 | Uncharacterized protein OS=Papio anubis PE=3 SV=1 - [A0A096NH99_PAPAN]                                  |          |
| A0A096NIL5 | Uncharacterized protein OS=Papio anubis PE=4 SV=1 - [A0A096NIL5_PAPAN]                                  |          |
| A0A096NBJ2 | Uncharacterized protein (Fragment) OS=Papio anubis PE=4 SV=1 - [A0A096NBJ2_PAPAN]                       |          |
| A0A096P228 | Uncharacterized protein OS=Papio anubis PE=4 SV=1 - [A0A096P228_PAPAN]                                  |          |
| A0A096MKN7 | Uncharacterized protein OS=Papio anubis PE=4 SV=1 - [A0A096MKN7_PAPAN]                                  |          |
| A0A096MLN5 | Uncharacterized protein OS=Papio anubis PE=3 SV=1 - [A0A096MLN5_PAPAN]                                  |          |
| A0A096MLS9 | Uncharacterized protein OS=Papio anubis PE=3 SV=1 - [A0A096MLS9_PAPAN]                                  |          |

|            |                                                                                                  |  |
|------------|--------------------------------------------------------------------------------------------------|--|
| A0A096MMM5 | Chloride intracellular channel protein (Fragment) OS=Papio anubis PE=3 SV=1 - [A0A096MMM5_PAPAN] |  |
| A0A096MPC9 | Protein S100 OS=Papio anubis PE=3 SV=1 - [A0A096MPC9_PAPAN]                                      |  |
| A0A096MRD8 | Uncharacterized protein OS=Papio anubis PE=3 SV=1 - [A0A096MRD8_PAPAN]                           |  |
| A0A096N1M9 | Proteasome subunit alpha type OS=Papio anubis PE=3 SV=1 - [A0A096N1M9_PAPAN]                     |  |
| A0A096N2T5 | Alpha-1,4 glucan phosphorylase OS=Papio anubis PE=3 SV=1 - [A0A096N2T5_PAPAN]                    |  |
| A0A096N3P5 | Annexin OS=Papio anubis PE=3 SV=1 - [A0A096N3P5_PAPAN]                                           |  |
| A0A096NC53 | Uncharacterized protein OS=Papio anubis PE=4 SV=1 - [A0A096NC53_PAPAN]                           |  |
| A0A096NCQ2 | Uncharacterized protein OS=Papio anubis PE=4 SV=1 - [A0A096NCQ2_PAPAN]                           |  |
| A0A096NHD7 | Uncharacterized protein OS=Papio anubis PE=3 SV=1 - [A0A096NHD7_PAPAN]                           |  |
| A0A096NIJ1 | Metallothionein OS=Papio anubis PE=3 SV=1 - [A0A096NIJ1_PAPAN]                                   |  |
| A0A096NJG5 | Uncharacterized protein (Fragment) OS=Papio anubis PE=3 SV=1 - [A0A096NJG5_PAPAN]                |  |
| A0A096NKC3 | Uncharacterized protein OS=Papio anubis PE=4 SV=1 - [A0A096NKC3_PAPAN]                           |  |
| A0A096NV64 | Uncharacterized protein OS=Papio anubis PE=4 SV=1 - [A0A096NV64_PAPAN]                           |  |
| A0A096P2Z5 | Uncharacterized protein OS=Papio anubis PE=4 SV=1 - [A0A096P2Z5_PAPAN]                           |  |
| A0A0A0MTY1 | Uncharacterized protein OS=Papio anubis PE=4 SV=1 - [A0A0A0MTY1_PAPAN]                           |  |
| A0A096MPU5 | Uncharacterized protein OS=Papio anubis PE=3 SV=1 - [A0A096MPU5_PAPAN]                           |  |
| A0A096N8X2 | Uncharacterized protein OS=Papio anubis PE=3 SV=1 - [A0A096N8X2_PAPAN]                           |  |
| A0A096N4E7 | Uncharacterized protein OS=Papio anubis PE=4 SV=1 - [A0A096N4E7_PAPAN]                           |  |
| A0A096N8V9 | Thioredoxin OS=Papio anubis PE=3 SV=1 - [A0A096N8V9_PAPAN]                                       |  |
| A0A096NRU7 | L-lactate dehydrogenase OS=Papio anubis PE=3 SV=1 - [A0A096NRU7_PAPAN]                           |  |
| A0A096MMB0 | Uncharacterized protein OS=Papio anubis PE=3 SV=1 - [A0A096MMB0_PAPAN]                           |  |
| A0A096N4F5 | Uncharacterized protein OS=Papio anubis PE=4 SV=1 - [A0A096N4F5_PAPAN]                           |  |
| A0A096N7R0 | Uncharacterized protein OS=Papio anubis PE=3 SV=1 - [A0A096N7R0_PAPAN]                           |  |
| A0A096NVY0 | Uncharacterized protein OS=Papio anubis PE=4 SV=1 - [A0A096NVY0_PAPAN]                           |  |
| A0A096P220 | Uncharacterized protein OS=Papio anubis PE=3 SV=1 - [A0A096P220_PAPAN]                           |  |
| A0A096MNM8 | Uncharacterized protein (Fragment) OS=Papio anubis PE=3 SV=1 - [A0A096MNM8_PAPAN]                |  |
| A0A096MLF8 | Uncharacterized protein OS=Papio anubis PE=4 SV=1 - [A0A096MLF8_PAPAN]                           |  |
| A0A096MN23 | 60S ribosomal protein L6 OS=Papio anubis PE=3 SV=1 - [A0A096MN23_PAPAN]                          |  |
| A0A096NJI8 | Uncharacterized protein OS=Papio anubis PE=4 SV=1 - [A0A096NJI8_PAPAN]                           |  |
| A0A096N7S1 | Uncharacterized protein (Fragment) OS=Papio anubis PE=4 SV=1 - [A0A096N7S1_PAPAN]                |  |
| A0A0A0MXJ5 | Uncharacterized protein OS=Papio anubis PE=4 SV=1 - [A0A0A0MXJ5_PAPAN]                           |  |
| A0A096NRA6 | Uncharacterized protein OS=Papio anubis PE=4 SV=1 - [A0A096NRA6_PAPAN]                           |  |
| A0A096MTY4 | Peptidyl-prolyl cis-trans isomerase OS=Papio anubis PE=3 SV=1 - [A0A096MTY4_PAPAN]               |  |
| J9QQL1     | L-lactate dehydrogenase OS=Papio anubis PE=3 SV=1 - [J9QQL1_PAPAN]                               |  |
| A0A096N402 | Uncharacterized protein OS=Papio anubis PE=3 SV=1 - [A0A096N402_PAPAN]                           |  |
| A0A096NEV9 | Uncharacterized protein OS=Papio anubis PE=4 SV=1 - [A0A096NEV9_PAPAN]                           |  |
| A0A096NGJ9 | Triosephosphate isomerase OS=Papio anubis PE=3 SV=1 - [A0A096NGJ9_PAPAN]                         |  |
| A0A096NJK4 | Uncharacterized protein OS=Papio anubis PE=3 SV=1 - [A0A096NJK4_PAPAN]                           |  |
| A0A096MPD7 | Ferritin OS=Papio anubis PE=3 SV=1 - [A0A096MPD7_PAPAN]                                          |  |
| A0A096NZ57 | Phosphoglycerate kinase OS=Papio anubis PE=3 SV=1 - [A0A096NZ57_PAPAN]                           |  |
| A0A096NRA8 | Beta-2-microglobulin OS=Papio anubis PE=4 SV=1 - [A0A096NRA8_PAPAN]                              |  |
| A0A096MKV5 | Uncharacterized protein (Fragment) OS=Papio anubis PE=4 SV=1 - [A0A096MKV5_PAPAN]                |  |
| A0A096NAA6 | Uncharacterized protein OS=Papio anubis PE=3 SV=1 - [A0A096NAA6_PAPAN]                           |  |
| A0A096MWA8 | Uncharacterized protein (Fragment) OS=Papio anubis PE=3 SV=1 - [A0A096MWA8_PAPAN]                |  |
| A0A096MVH0 | Histone H2A OS=Papio anubis PE=3 SV=1 - [A0A096MVH0_PAPAN]                                       |  |
| A0A096NR24 | Uncharacterized protein OS=Papio anubis PE=4 SV=1 - [A0A096NR24_PAPAN]                           |  |
| A0A096MWU6 | Uncharacterized protein OS=Papio anubis PE=3 SV=1 - [A0A096MWU6_PAPAN]                           |  |
| A0A096MMB7 | Serum amyloid A protein OS=Papio anubis PE=3 SV=1 - [A0A096MMB7_PAPAN]                           |  |

|            |                                                                                    |  |
|------------|------------------------------------------------------------------------------------|--|
| A0A096MNB6 | Uncharacterized protein OS=Papio anubis PE=4 SV=1 - [A0A096MNB6_PAPAN]             |  |
| A0A096MRM1 | Uncharacterized protein (Fragment) OS=Papio anubis PE=4 SV=1 - [A0A096MRM1_PAPAN]  |  |
| A0A096MWD4 | Uncharacterized protein OS=Papio anubis PE=4 SV=1 - [A0A096MWD4_PAPAN]             |  |
| A0A096N5X5 | Uncharacterized protein OS=Papio anubis PE=4 SV=1 - [A0A096N5X5_PAPAN]             |  |
| A0A096N8D0 | Uncharacterized protein OS=Papio anubis PE=3 SV=1 - [A0A096N8D0_PAPAN]             |  |
| A0A096N992 | Uncharacterized protein OS=Papio anubis PE=4 SV=1 - [A0A096N992_PAPAN]             |  |
| A0A096N9Z3 | Uncharacterized protein OS=Papio anubis PE=4 SV=1 - [A0A096N9Z3_PAPAN]             |  |
| A0A096NB31 | Uncharacterized protein OS=Papio anubis PE=3 SV=1 - [A0A096NB31_PAPAN]             |  |
| A0A096NDZ9 | Uncharacterized protein OS=Papio anubis PE=4 SV=1 - [A0A096NDZ9_PAPAN]             |  |
| A0A096NGS3 | Uncharacterized protein OS=Papio anubis PE=4 SV=1 - [A0A096NGS3_PAPAN]             |  |
| A0A096NGY2 | Uncharacterized protein OS=Papio anubis PE=4 SV=1 - [A0A096NGY2_PAPAN]             |  |
| A0A096NHQ3 | Fructose-bisphosphate aldolase OS=Papio anubis PE=3 SV=1 - [A0A096NHQ3_PAPAN]      |  |
| A0A096NIP6 | Uncharacterized protein OS=Papio anubis PE=4 SV=1 - [A0A096NIP6_PAPAN]             |  |
| A0A096NKN9 | Uncharacterized protein OS=Papio anubis PE=3 SV=1 - [A0A096NKN9_PAPAN]             |  |
| A0A096NKP1 | Uncharacterized protein (Fragment) OS=Papio anubis PE=3 SV=1 - [A0A096NKP1_PAPAN]  |  |
| A0A096NPS2 | Ribulose-phosphate 3-epimerase OS=Papio anubis PE=3 SV=1 - [A0A096NPS2_PAPAN]      |  |
| A0A096NU77 | Uncharacterized protein OS=Papio anubis PE=4 SV=1 - [A0A096NU77_PAPAN]             |  |
| A0A096NUN6 | Uncharacterized protein OS=Papio anubis PE=4 SV=1 - [A0A096NUN6_PAPAN]             |  |
| A0A096NYR9 | Uncharacterized protein OS=Papio anubis PE=4 SV=1 - [A0A096NYR9_PAPAN]             |  |
| A0A096MMB4 | Uncharacterized protein OS=Papio anubis PE=4 SV=1 - [A0A096MMB4_PAPAN]             |  |
| A0A096P191 | Uncharacterized protein OS=Papio anubis PE=3 SV=1 - [A0A096P191_PAPAN]             |  |
| A0A096MP73 | Peptidyl-prolyl cis-trans isomerase OS=Papio anubis PE=3 SV=1 - [A0A096MP73_PAPAN] |  |
| A0A096NG97 | Ferritin OS=Papio anubis PE=4 SV=1 - [A0A096NG97_PAPAN]                            |  |
| F1JY22     | Beta-actin (Fragment) OS=Papio anubis PE=2 SV=1 - [F1JY22_PAPAN]                   |  |

Jiang, X., Ye, M., Jiang, X., Liu, G., Feng, S., Cui, L., & Zou, H. (2007). Method Development of Efficient Protein Extraction in Bone Tissue for Proteome Analysis. *Journal of Proteome Research*. doi: 10.1021/pr070056t. doi: 10.1021/pr070056t, 6(6), 2287–2294. JOUR. <http://doi.org/10.1021/pr070056t>
