# Supplementary material
Source: PubMed Central journal article supplement (PMC9117570)
Supplement: NIHMS1755793-supplement-tS2.pdf [file NIHMS1755793-supplement-tS2.pdf]

**Supplementary Table 2.** Predicted mRNA gene targets for each of the five miRNAs significantly associated with aBMD were identified based on experimental validation of miRNA-mRNA interaction via luciferase, qRT-PCR, or Western blot experiments as well as the presence of proteins from the targeted mRNA in baboon bone.

| <b>Mature miRNA ID</b> | <b>Target Gene Name</b> |
|------------------------|-------------------------|
| hsa-miR-16-2-3p        | IGFBP5                  |
| hsa-miR-16-2-3p        | SUB1                    |
| hsa-miR-197-3p         | ALDOA                   |
| hsa-miR-197-3p         | CYCS                    |
| hsa-miR-197-3p         | EEF1A1                  |
| hsa-miR-197-3p         | FGB                     |
| hsa-miR-197-3p         | IGFBP5                  |
| hsa-miR-197-3p         | ISYNA1                  |
| hsa-miR-197-3p         | MYH9                    |
| hsa-miR-197-3p         | NME2                    |
| hsa-miR-197-3p         | RFX1                    |
| hsa-miR-197-3p         | RPL14                   |
| hsa-miR-197-3p         | SOD1                    |
| hsa-miR-197-3p         | SOD2                    |
| hsa-miR-197-3p         | VDAC1                   |
| hsa-miR-21-5p          | ACAT1                   |
| hsa-miR-21-5p          | CENPQ                   |
| hsa-miR-21-5p          | CLU                     |
| hsa-miR-21-5p          | COL5A2                  |
| hsa-miR-21-5p          | DTX3L                   |
| hsa-miR-21-5p          | FAM126B                 |
| hsa-miR-21-5p          | FUBP1                   |
| hsa-miR-21-5p          | HNRNPK                  |
| hsa-miR-21-5p          | KBTBD7                  |
| hsa-miR-21-5p          | LAMP2                   |
| hsa-miR-21-5p          | MMP9                    |
| hsa-miR-21-5p          | NCSTN                   |
| hsa-miR-21-5p          | PARP1                   |
| hsa-miR-21-5p          | PKD2                    |
| hsa-miR-21-5p          | PTX3                    |
| hsa-miR-21-5p          | PURA                    |
| hsa-miR-21-5p          | RPS7                    |
| hsa-miR-21-5p          | SOD3                    |
| hsa-miR-320a           | ANXA11                  |
| hsa-miR-320a           | CALM3                   |
| hsa-miR-320a           | CALR                    |

|                 |          |
|-----------------|----------|
| hsa-miR-320a    | CD44     |
| hsa-miR-320a    | COTL1    |
| hsa-miR-320a    | EEF2     |
| hsa-miR-320a    | EP400    |
| hsa-miR-320a    | GAPDH    |
| hsa-miR-320a    | HSP90AB1 |
| hsa-miR-320a    | HSPA9    |
| hsa-miR-320a    | ISYNA1   |
| hsa-miR-320a    | LMNB1    |
| hsa-miR-320a    | MDH2     |
| hsa-miR-320a    | MIF      |
| hsa-miR-320a    | MMP9     |
| hsa-miR-320a    | MRPS18B  |
| hsa-miR-320a    | PFN1     |
| hsa-miR-320a    | PKM      |
| hsa-miR-320a    | PRDX3    |
| hsa-miR-320a    | RALY     |
| hsa-miR-320a    | RPL8     |
| hsa-miR-320a    | RPLP1    |
| hsa-miR-320a    | RPS17    |
| hsa-miR-320a    | SNRPB    |
| hsa-miR-320a    | SNRPD2   |
| hsa-miR-320a    | TFRC     |
| hsa-miR-320a    | TOB2     |
| hsa-miR-320a    | VCL      |
| hsa-miR-320a    | VDAC1    |
| hsa-miR-320a    | VDAC2    |
| hsa-miR-320b    | MRPS18B  |
| hsa-miR-320b    | PFN1     |
| hsa-miR-320b    | VCL      |
| hsa-miR-331-5p  | CENPQ    |
| hsa-miR-331-5p  | RHOA     |
| hsa-miR-331-5p  | SOD2     |
| hsa-miR-339-5p  | EEF1A1   |
| hsa-miR-339-5p  | FRRS1    |
| hsa-miR-339-5p  | HSPA9    |
| hsa-miR-339-5p  | NCSTN    |
| hsa-miR-339-5p  | PARP1    |
| hsa-miR-339-5p  | PGD      |
| hsa-miR-339-5p  | PSAP     |
| hsa-miR-339-5p  | SOD2     |
| hsa-miR-371a-5p | CPM      |
| hsa-miR-371a-5p | CYCS     |

|                 |          |
|-----------------|----------|
| hsa-miR-371a-5p | HMG2     |
| hsa-miR-371a-5p | HSP90AA1 |
| hsa-miR-371a-5p | OMD      |
| hsa-miR-371a-5p | TLN1     |
| hsa-miR-374a-3p | HSP90AA1 |
| hsa-miR-374a-5p | CASP3    |
| hsa-miR-374a-5p | CENPQ    |
| hsa-miR-374a-5p | EPDR1    |
| hsa-miR-374a-5p | MYLIP    |
| hsa-miR-374a-5p | PRDX3    |
| hsa-miR-374a-5p | RAP1B    |
| hsa-miR-423-5p  | ADAMTS14 |
| hsa-miR-423-5p  | ARHGDI1  |
| hsa-miR-423-5p  | CALM3    |
| hsa-miR-423-5p  | CEACAM6  |
| hsa-miR-423-5p  | GAPDH    |
| hsa-miR-423-5p  | MFGE8    |
| hsa-miR-423-5p  | NDE1     |
| hsa-miR-423-5p  | NME2     |
| hsa-miR-423-5p  | PGAM4    |
| hsa-miR-423-5p  | PKM      |
| hsa-miR-423-5p  | PPIB     |
| hsa-miR-424-3p  | EEF2K    |
| hsa-miR-424-3p  | LGALS3   |
| hsa-miR-424-3p  | SNRPD1   |
| hsa-miR-484     | ADGRE5   |
| hsa-miR-484     | ANXA11   |
| hsa-miR-484     | ANXA6    |
| hsa-miR-484     | ARHGDI1  |
| hsa-miR-484     | CAP1     |
| hsa-miR-484     | CAPZB    |
| hsa-miR-484     | CASP7    |
| hsa-miR-484     | CBR1     |
| hsa-miR-484     | CUTA     |
| hsa-miR-484     | DHX15    |
| hsa-miR-484     | EEF1A1   |
| hsa-miR-484     | EEF2     |
| hsa-miR-484     | FGB      |
| hsa-miR-484     | FLNA     |
| hsa-miR-484     | FUZ      |
| hsa-miR-484     | GANAB    |
| hsa-miR-484     | GAPDH    |
| hsa-miR-484     | GNS      |

|             |          |
|-------------|----------|
| hsa-miR-484 | HNRNPC   |
| hsa-miR-484 | HNRNPK   |
| hsa-miR-484 | HSP90AA1 |
| hsa-miR-484 | HSP90AB1 |
| hsa-miR-484 | LAMP1    |
| hsa-miR-484 | LMNB1    |
| hsa-miR-484 | MDH2     |
| hsa-miR-484 | MGAT5    |
| hsa-miR-484 | MRPS18B  |
| hsa-miR-484 | MYH9     |
| hsa-miR-484 | MYO5A    |
| hsa-miR-484 | P4HB     |
| hsa-miR-484 | PARP1    |
| hsa-miR-484 | PDXK     |
| hsa-miR-484 | PFKL     |
| hsa-miR-484 | PGD      |
| hsa-miR-484 | PHB      |
| hsa-miR-484 | PKM      |
| hsa-miR-484 | PRDX1    |
| hsa-miR-484 | PRDX4    |
| hsa-miR-484 | PURA     |
| hsa-miR-484 | RPN2     |
| hsa-miR-484 | SNRPD2   |
| hsa-miR-484 | SNRPD3   |
| hsa-miR-484 | TKT      |
| hsa-miR-484 | TLN1     |
| hsa-miR-484 | ZC3H7B   |
| hsa-miR-484 | ZZEF1    |
